# Supplementary material for: Plasma and Tissue Specific miRNA Expression Pattern and Functional Analysis Associated to Colorectal Cancer Patients
Source: PubMed Central journal article supplement (PMC7226631; doi:10.3390/cancers12040843), 2020-03-31
Supplement: cancers-12-00843-s001.pdf [file cancers-12-00843-s001.pdf]

Supplementary Materials

## Plasma and Tissue Specific miRNA Expression Pattern and Functional Analysis Associated to Colorectal Cancer Patients

Roxana Cojocneanu, Cornelia Braicu, Lajos Raduly, Ancuta Jurj, Oana Zanoaga, Lorand Magdo, Alexandru Irimie, Mihai-Stefan Muresan, Calin Ionescu, Mircea Grigorescu and Ioana Berindan-Neagoe

**Table S1.** Differentially expressed miRNAs were analyzed in COAD versus normal tissue based on TCGA data. The threshold value for upregulated and downregulated genes was a fold change  $\geq 1.5$  and  $p$ -value  $\leq 0.05$ .

| Systematic Name | FC (abs)   | Regulation | $p$      |
|-----------------|------------|------------|----------|
| hsa-mir-486     | -69.17818  | down       | 2.20E-34 |
| hsa-mir-139     | -42.967876 | down       | 0        |
| hsa-mir-328     | -41.69208  | down       | 0        |
| hsa-mir-197     | -31.175646 | down       | 0        |
| hsa-mir-129-1   | -25.215168 | down       | 8.51E-42 |
| hsa-mir-133a-1  | -23.520296 | down       | 6.88E-17 |
| hsa-mir-1224    | -21.101189 | down       | 1.32E-30 |
| hsa-mir-642     | -20.974354 | down       | 1.95E-24 |
| hsa-mir-1976    | -20.189072 | down       | 1.40E-45 |
| hsa-mir-149     | -20.158945 | down       | 6.87E-25 |
| hsa-mir-766     | -19.219688 | down       | 8.40E-45 |
| hsa-mir-504     | -18.5475   | down       | 0        |
| hsa-mir-150     | -18.411493 | down       | 3.74E-19 |
| hsa-mir-1180    | -17.228813 | down       | 3.06E-23 |
| hsa-mir-125a    | -17.013721 | down       | 0        |
| hsa-mir-1306    | -16.964342 | down       | 3.71E-39 |
| hsa-mir-145     | -15.507499 | down       | 1.48E-23 |
| hsa-mir-490     | -15.239713 | down       | 2.56E-12 |
| hsa-mir-574     | -15.110625 | down       | 4.45E-33 |
| hsa-let-7d      | -12.95204  | down       | 0        |
| hsa-mir-375     | -12.896943 | down       | 1.35E-13 |
| hsa-mir-193a    | -11.601966 | down       | 1.18E-25 |
| hsa-let-7b      | -11.516078 | down       | 0        |
| hsa-mir-181a-1  | -11.288839 | down       | 2.36E-33 |
| hsa-mir-92b     | -10.94404  | down       | 6.58E-23 |
| hsa-mir-1296    | -10.22103  | down       | 8.94E-23 |
| hsa-mir-378     | -9.980089  | down       | 7.81E-25 |
| hsa-mir-193b    | -9.6425    | down       | 4.98E-22 |
| hsa-mir-99b     | -9.268363  | down       | 9.06E-31 |
| hsa-mir-125b-1  | -9.176319  | down       | 9.88E-16 |
| hsa-mir-423     | -9.1388445 | down       | 1.06E-37 |
| hsa-mir-1226    | -8.494278  | down       | 8.18E-29 |
| hsa-let-7c      | -8.370713  | down       | 3.69E-12 |
| hsa-mir-296     | -8.16921   | down       | 2.14E-10 |
| hsa-mir-326     | -8.118997  | down       | 2.20E-17 |
| hsa-mir-485     | -8.062454  | down       | 1.74E-22 |
| hsa-mir-2110    | -7.7612824 | down       | 3.38E-26 |
| hsa-mir-874     | -7.568354  | down       | 1.14E-15 |
| hsa-mir-433     | -7.1413856 | down       | 9.05E-28 |
| hsa-mir-1307    | -7.0567975 | down       | 4.28E-17 |
| hsa-mir-484     | -6.93172   | down       | 2.52E-23 |
| hsa-mir-671     | -6.5911164 | down       | 2.17E-26 |
| hsa-mir-324     | -6.4117045 | down       | 1.08E-21 |
| hsa-mir-205     | -6.3746424 | down       | 4.97E-05 |

---

|                |            |      |             |
|----------------|------------|------|-------------|
| hsa-mir-1249   | -6.288611  | down | 5.85E-25    |
| hsa-mir-1468   | -6.1595893 | down | 1.88E-16    |
| hsa-mir-605    | -6.03544   | down | 3.24E-35    |
| hsa-mir-15b    | -5.841153  | down | 2.72E-19    |
| hsa-mir-767    | -5.7812295 | down | 5.37E-05    |
| hsa-mir-589    | -5.7689524 | down | 8.01E-27    |
| hsa-mir-744    | -5.6886044 | down | 8.23E-14    |
| hsa-mir-187    | -5.6664586 | down | 1.49E-10    |
| hsa-mir-432    | -5.5770664 | down | 4.11E-15    |
| hsa-mir-92a-2  | -5.5019746 | down | 5.26E-13    |
| hsa-mir-1826   | -5.4880443 | down | 5.19E-04    |
| hsa-mir-937    | -5.3118467 | down | 6.06E-12    |
| hsa-mir-1266   | -5.041714  | down | 6.02E-08    |
| hsa-mir-885    | -5.0058317 | down | 0           |
| hsa-mir-133b   | -4.928623  | down | 3.87E-06    |
| hsa-mir-140    | -4.795257  | down | 1.53E-20    |
| hsa-mir-483    | -4.780864  | down | 0.018092668 |
| hsa-mir-132    | -4.7191024 | down | 1.19E-18    |
| hsa-mir-1228   | -4.71424   | down | 4.51E-22    |
| hsa-mir-339    | -4.669636  | down | 5.31E-10    |
| hsa-mir-200c   | -4.651522  | down | 1.05E-11    |
| hsa-mir-615    | -4.6386333 | down | 4.06E-08    |
| hsa-mir-652    | -4.508768  | down | 5.19E-15    |
| hsa-mir-342    | -4.4253483 | down | 2.97E-10    |
| hsa-mir-760    | -4.4200187 | down | 7.35E-14    |
| hsa-mir-370    | -4.247514  | down | 2.53E-13    |
| hsa-mir-501    | -4.187298  | down | 3.74E-09    |
| hsa-mir-320a   | -4.0551715 | down | 2.17E-07    |
| hsa-mir-487a   | -3.9696276 | down | 2.04E-16    |
| hsa-mir-887    | -3.915102  | down | 7.15E-14    |
| hsa-mir-431    | -3.6844723 | down | 1.51E-10    |
| hsa-mir-219-1  | -3.680956  | down | 3.46E-11    |
| hsa-mir-1538   | -3.6361578 | down | 4.03E-34    |
| hsa-mir-323    | -3.6258848 | down | 3.86E-09    |
| hsa-mir-361    | -3.5730257 | down | 1.75E-12    |
| hsa-mir-331    | -3.5566528 | down | 6.50E-08    |
| hsa-mir-204    | -3.4982772 | down | 7.58E-04    |
| hsa-mir-505    | -3.3903127 | down | 1.92E-10    |
| hsa-mir-877    | -3.318865  | down | 2.23E-07    |
| hsa-mir-1229   | -3.2131255 | down | 3.09E-15    |
| hsa-mir-127    | -3.0669692 | down | 1.83E-09    |
| hsa-let-7a-1   | -3.065293  | down | 5.75E-11    |
| hsa-mir-935    | -3.0461838 | down | 0.00287151  |
| hsa-mir-1254   | -3.0458095 | down | 1.06E-13    |
| hsa-mir-891a   | -3.0390332 | down | 3.27E-06    |
| hsa-mir-218-1  | -3.0222836 | down | 2.19E-22    |
| hsa-mir-1301   | -3.018671  | down | 6.48E-08    |
| hsa-mir-886    | -2.9895837 | down | 2.85E-04    |
| hsa-mir-363    | -2.942934  | down | 1.41E-04    |
| hsa-mir-1975   | -2.906888  | down | 0.001363733 |
| hsa-mir-365-1  | -2.8796299 | down | 7.53E-07    |
| hsa-mir-1295   | -2.8428178 | down | 1.19E-23    |
| hsa-mir-320c-1 | -2.7553587 | down | 5.63E-17    |
| hsa-mir-1271   | -2.7515128 | down | 3.35E-06    |
| hsa-mir-28     | -2.7353003 | down | 3.07E-20    |
| hsa-mir-181b-1 | -2.6932461 | down | 9.31E-07    |
| hsa-mir-664    | -2.665683  | down | 4.86E-08    |
| hsa-mir-330    | -2.6462743 | down | 2.39E-05    |
| hsa-mir-455    | -2.6429012 | down | 0.002250523 |
| hsa-mir-1275   | -2.6178226 | down | 0.001932895 |
| hsa-mir-1274b  | -2.5617502 | down | 0.003962798 |
| hsa-mir-1248   | -2.5306215 | down | 9.26E-05    |
| hsa-mir-30d    | -2.5143723 | down | 4.86E-08    |
| hsa-mir-625    | -2.4814641 | down | 0.001394254 |
| hsa-mir-1227   | -2.471171  | down | 6.12E-25    |

---

|                |            |      |             |
|----------------|------------|------|-------------|
| hsa-mir-346    | -2.462659  | down | 2.14E-35    |
| hsa-let-7e     | -2.4142275 | down | 3.02E-05    |
| hsa-mir-500    | -2.3832695 | down | 8.10E-05    |
| hsa-mir-1287   | -2.380573  | down | 4.03E-07    |
| hsa-mir-1270   | -2.3523426 | down | 5.28E-10    |
| hsa-mir-214    | -2.3501306 | down | 3.48E-04    |
| hsa-mir-191    | -2.2996209 | down | 1.32E-05    |
| hsa-mir-1292   | -2.2644854 | down | 2.80E-09    |
| hsa-mir-940    | -2.176189  | down | 0.00138487  |
| hsa-mir-939    | -2.1097183 | down | 4.76E-06    |
| hsa-mir-320b-2 | -2.0855532 | down | 0.004718452 |
| hsa-mir-497    | -2.062978  | down | 5.21E-04    |
| hsa-mir-409    | -2.0508657 | down | 1.45E-04    |
| hsa-mir-632    | -1.9552885 | down | 1.61E-07    |
| hsa-mir-663b   | -1.9491395 | down | 0.006409941 |
| hsa-mir-658    | -1.8801347 | down | 7.12E-08    |
| hsa-mir-30c-2  | -1.8182406 | down | 0.001374953 |
| hsa-mir-550-2  | -1.7813472 | down | 0.00847958  |
| hsa-mir-377    | -1.7410277 | down | 0.006318152 |
| hsa-mir-491    | -1.7368131 | down | 0.003009533 |
| hsa-mir-639    | -1.7293487 | down | 8.54E-04    |
| hsa-mir-1181   | -1.6956798 | down | 1.06E-04    |
| hsa-mir-410    | -1.6169846 | down | 0.035125908 |
| hsa-mir-543    | -1.6152669 | down | 0.002571987 |
| hsa-mir-383    | -1.6124716 | down | 0.009697244 |
| hsa-mir-23b    | -1.5909384 | down | 0.015085858 |
| hsa-mir-146b   | -1.5897484 | down | 0.01843226  |
| hsa-mir-1291   | -1.5848768 | down | 0.021788832 |
| hsa-let-7i     | -1.5837309 | down | 3.02E-04    |
| hsa-mir-1234   | -1.5805634 | down | 1.76E-17    |
| hsa-mir-106b   | -1.5497692 | down | 0.006169519 |
| hsa-mir-24-1   | -1.5300697 | down | 0.024964344 |
| hsa-mir-138-1  | -1.5150045 | down | 0.0032865   |
| hsa-mir-374a   | 140.92953  | up   | 0           |
| hsa-mir-142    | 65.22522   | up   | 1.82E-30    |
| hsa-mir-19b-2  | 63.5723    | up   | 0           |
| hsa-mir-135b   | 60.82974   | up   | 1.00E-23    |
| hsa-mir-21     | 52.989597  | up   | 0           |
| hsa-mir-19a    | 45.7885    | up   | 2.60E-27    |
| hsa-mir-577    | 40.05445   | up   | 6.27E-13    |
| hsa-mir-424    | 30.184464  | up   | 8.15E-33    |
| hsa-mir-29b-1  | 30.046535  | up   | 2.06E-38    |
| hsa-mir-101-1  | 29.692446  | up   | 0           |
| hsa-mir-542    | 28.222824  | up   | 0           |
| hsa-mir-582    | 27.83786   | up   | 8.70E-39    |
| hsa-mir-708    | 24.78667   | up   | 3.67E-36    |
| hsa-mir-144    | 23.961945  | up   | 7.08E-24    |
| hsa-mir-141    | 22.687477  | up   | 4.10E-37    |
| hsa-mir-20a    | 22.144264  | up   | 1.93E-30    |
| hsa-mir-590    | 21.505735  | up   | 1.94E-26    |
| hsa-mir-153-2  | 20.456884  | up   | 6.87E-17    |
| hsa-mir-592    | 19.946692  | up   | 8.58E-10    |
| hsa-mir-335    | 19.592241  | up   | 5.06E-34    |
| hsa-mir-182    | 18.78644   | up   | 3.18E-31    |
| hsa-mir-452    | 17.161093  | up   | 5.54E-30    |
| hsa-mir-215    | 16.743689  | up   | 3.05E-11    |
| hsa-mir-552    | 16.048706  | up   | 1.84E-09    |
| hsa-mir-203    | 14.982542  | up   | 8.11E-17    |
| hsa-mir-379    | 14.027545  | up   | 3.30E-36    |
| hsa-mir-16-1   | 13.9177475 | up   | 7.24E-24    |
| hsa-mir-96     | 12.935062  | up   | 3.83E-25    |
| hsa-mir-889    | 12.8214655 | up   | 6.96E-39    |
| hsa-mir-98     | 12.206911  | up   | 0           |
| hsa-mir-136    | 11.756475  | up   | 1.66E-17    |
| hsa-mir-1-2    | 11.736584  | up   | 4.75E-11    |

---

|                |           |    |             |
|----------------|-----------|----|-------------|
| hsa-mir-374b   | 11.382514 | up | 1.24E-35    |
| hsa-mir-628    | 11.372878 | up | 6.20E-11    |
| hsa-mir-126    | 10.745708 | up | 2.87E-25    |
| hsa-mir-217    | 10.295042 | up | 2.40E-14    |
| hsa-mir-148a   | 9.867116  | up | 4.41E-20    |
| hsa-mir-152    | 9.414362  | up | 7.31E-43    |
| hsa-mir-301a   | 9.122609  | up | 9.49E-12    |
| hsa-mir-450b   | 8.92358   | up | 6.22E-21    |
| hsa-mir-429    | 8.92357   | up | 1.53E-16    |
| hsa-mir-15a    | 8.417794  | up | 2.86E-28    |
| hsa-mir-660    | 8.408914  | up | 7.37E-20    |
| hsa-mir-32     | 7.9090858 | up | 7.04E-20    |
| hsa-mir-454    | 7.865963  | up | 5.96E-27    |
| hsa-mir-369    | 6.793081  | up | 2.11E-20    |
| hsa-mir-17     | 6.714736  | up | 4.21E-16    |
| hsa-mir-143    | 6.711155  | up | 3.83E-11    |
| hsa-mir-30b    | 6.6690645 | up | 2.29E-16    |
| hsa-mir-106a   | 6.2725577 | up | 3.07E-05    |
| hsa-mir-411    | 6.2438    | up | 3.42E-15    |
| hsa-mir-218-2  | 6.183688  | up | 6.93E-13    |
| hsa-mir-7-1    | 6.1583357 | up | 3.69E-15    |
| hsa-mir-10a    | 5.919755  | up | 1.32E-12    |
| hsa-mir-199b   | 5.7847676 | up | 2.82E-10    |
| hsa-mir-653    | 5.6058817 | up | 7.58E-07    |
| hsa-mir-376c   | 5.4012823 | up | 2.63E-13    |
| hsa-mir-337    | 5.3318877 | up | 1.32E-16    |
| hsa-mir-192    | 5.2031627 | up | 1.62E-07    |
| hsa-mir-598    | 5.127586  | up | 1.79E-09    |
| hsa-mir-183    | 4.7046022 | up | 6.93E-10    |
| hsa-mir-33a    | 4.453369  | up | 2.64E-05    |
| hsa-mir-340    | 4.3543253 | up | 2.83E-16    |
| hsa-mir-29c    | 4.2929397 | up | 3.25E-09    |
| hsa-mir-421    | 4.2544603 | up | 4.89E-11    |
| hsa-mir-95     | 4.1945605 | up | 3.55E-07    |
| hsa-mir-495    | 4.146432  | up | 6.16E-16    |
| hsa-mir-451    | 4.125477  | up | 4.40E-05    |
| hsa-mir-223    | 4.0699043 | up | 9.68E-06    |
| hsa-mir-24-2   | 3.9893742 | up | 5.30E-25    |
| hsa-mir-31     | 3.9565177 | up | 0.005236639 |
| hsa-mir-199a-2 | 3.7405434 | up | 4.16E-07    |
| hsa-mir-188    | 3.7089033 | up | 2.01E-06    |
| hsa-mir-27a    | 3.6482308 | up | 2.51E-10    |
| hsa-mir-196a-1 | 3.6381824 | up | 1.30E-04    |
| hsa-mir-450a-1 | 3.4919376 | up | 3.65E-09    |
| hsa-mir-33b    | 3.4794478 | up | 7.89E-05    |
| hsa-mir-338    | 3.4540892 | up | 1.69E-04    |
| hsa-mir-26b    | 3.4343598 | up | 3.21E-11    |
| hsa-mir-651    | 3.3484898 | up | 3.87E-08    |
| hsa-mir-18a    | 3.2894936 | up | 5.87E-05    |
| hsa-let-7f-1   | 3.2703521 | up | 7.14E-17    |
| hsa-mir-194-1  | 3.245227  | up | 1.03E-07    |
| hsa-mir-196b   | 3.2206805 | up | 0.003327127 |
| hsa-mir-10b    | 3.2112288 | up | 3.02E-09    |
| hsa-mir-190    | 3.1710253 | up | 3.17E-09    |
| hsa-mir-30e    | 3.1080387 | up | 1.08E-15    |
| hsa-mir-34a    | 3.0841117 | up | 5.19E-08    |
| hsa-mir-224    | 2.9725883 | up | 1.64E-04    |
| hsa-mir-301b   | 2.9368408 | up | 2.57E-05    |
| hsa-mir-103-2  | 2.8811517 | up | 2.95E-05    |
| hsa-mir-146a   | 2.8789024 | up | 1.24E-04    |
| hsa-mir-151    | 2.7641008 | up | 1.22E-09    |
| hsa-mir-496    | 2.6916192 | up | 7.60E-08    |
| hsa-mir-26a-2  | 2.6861076 | up | 2.59E-11    |
| hsa-mir-22     | 2.6556854 | up | 1.04E-13    |
| hsa-mir-493    | 2.6089272 | up | 2.84E-08    |

---

|                |           |    |             |
|----------------|-----------|----|-------------|
| hsa-mir-584    | 2.5641572 | up | 0.002599256 |
| hsa-mir-508    | 2.5492427 | up | 0.025842048 |
| hsa-mir-627    | 2.5214627 | up | 1.41E-05    |
| hsa-mir-1977   | 2.500068  | up | 0.010464604 |
| hsa-let-7g     | 2.4424646 | up | 8.04E-11    |
| hsa-mir-376a-1 | 2.4373012 | up | 1.19E-06    |
| hsa-mir-147b   | 2.410581  | up | 0.004115132 |
| hsa-mir-1245   | 2.3560169 | up | 1.23E-06    |
| hsa-mir-655    | 2.35559   | up | 1.61E-06    |
| hsa-mir-181d   | 2.3057535 | up | 0.003218368 |
| hsa-mir-1277   | 2.285632  | up | 2.55E-05    |
| hsa-mir-376b   | 2.2767627 | up | 1.71E-05    |
| hsa-mir-549    | 2.2236876 | up | 3.74E-05    |
| hsa-mir-185    | 2.2018151 | up | 3.18E-07    |
| hsa-mir-494    | 2.1872504 | up | 8.39E-06    |
| hsa-mir-556    | 2.165163  | up | 9.81E-05    |
| hsa-mir-576    | 2.1492126 | up | 8.88E-04    |
| hsa-mir-412    | 2.1008253 | up | 0.012250098 |
| hsa-mir-186    | 2.0487375 | up | 6.23E-05    |
| hsa-mir-130a   | 2.014791  | up | 0.001836359 |
| hsa-mir-499    | 1.8538002 | up | 0.011716682 |
| hsa-mir-545    | 1.8008773 | up | 3.92E-04    |
| hsa-mir-570    | 1.746147  | up | 8.08E-04    |
| hsa-mir-643    | 1.7392558 | up | 1.64E-04    |
| hsa-mir-548f-1 | 1.7317908 | up | 0.013023482 |
| hsa-mir-758    | 1.7260778 | up | 0.008539054 |
| hsa-mir-1308   | 1.7176796 | up | 0.013787789 |
| hsa-mir-23a    | 1.7013396 | up | 4.70E-04    |
| hsa-mir-107    | 1.6853368 | up | 4.09E-04    |
| hsa-mir-380    | 1.6485493 | up | 4.16E-04    |
| hsa-mir-216a   | 1.6447345 | up | 0.00721922  |
| hsa-mir-200a   | 1.6173214 | up | 0.023149977 |
| hsa-mir-559    | 1.6038537 | up | 0.002255896 |
| hsa-mir-656    | 1.5602485 | up | 0.001615316 |
| hsa-mir-25     | 1.5594497 | up | 0.009705679 |
| hsa-mir-580    | 1.5435183 | up | 0.001934664 |
| hsa-mir-382    | 1.5420406 | up | 0.013450535 |

**Table S2.** Differentially expressed miRNAs were analyzed in READ cancer versus normal tissue based on TCGA data. The threshold value for upregulated and downregulated genes was a fold change  $\geq 1.5$  and  $p$ -value  $\leq 0.05$ .

| Systematic Name | FC (abs)   | Regulation | $p$      |
|-----------------|------------|------------|----------|
| hsa-mir-490     | -135.98697 | down       | 6.59E-13 |
| hsa-mir-328     | -134.68758 | down       | 4.40E-37 |
| hsa-mir-139     | -80.28687  | down       | 1.06E-30 |
| hsa-mir-504     | -76.078545 | down       | 0        |
| hsa-mir-486     | -70.63095  | down       | 1.51E-14 |
| hsa-mir-133a-1  | -64.6055   | down       | 3.18E-13 |
| hsa-mir-149     | -59.165817 | down       | 5.27E-20 |
| hsa-mir-129-1   | -56.821983 | down       | 2.61E-31 |
| hsa-mir-1224    | -55.13707  | down       | 5.54E-30 |
| hsa-mir-197     | -47.221104 | down       | 3.44E-27 |
| hsa-mir-574     | -46.144466 | down       | 4.35E-23 |
| hsa-mir-766     | -42.3317   | down       | 3.27E-30 |
| hsa-mir-145     | -36.196594 | down       | 1.82E-15 |
| hsa-mir-193a    | -30.22148  | down       | 3.59E-18 |
| hsa-mir-125a    | -29.290022 | down       | 8.03E-23 |
| hsa-mir-1306    | -27.28638  | down       | 2.49E-20 |
| hsa-mir-1180    | -26.601833 | down       | 4.06E-12 |
| hsa-let-7d      | -24.964872 | down       | 1.05E-34 |
| hsa-mir-150     | -23.079159 | down       | 1.77E-12 |
| hsa-mir-1296    | -21.62183  | down       | 3.60E-16 |
| hsa-mir-92b     | -19.150013 | down       | 2.37E-12 |

---

|                |             |      |             |
|----------------|-------------|------|-------------|
| hsa-mir-1249   | -18.639511  | down | 9.40E-22    |
| hsa-mir-99b    | -18.635223  | down | 1.98E-22    |
| hsa-mir-125b-1 | -15.973903  | down | 2.26E-08    |
| hsa-mir-1976   | -15.401709  | down | 5.95E-17    |
| hsa-mir-485    | -14.917463  | down | 1.50E-14    |
| hsa-mir-605    | -14.679367  | down | 1.30E-23    |
| hsa-mir-193b   | -14.586462  | down | 6.73E-11    |
| hsa-mir-1226   | -12.453842  | down | 6.76E-17    |
| hsa-mir-326    | -11.861671  | down | 1.06E-11    |
| hsa-let-7b     | -11.739235  | down | 1.37E-18    |
| hsa-mir-433    | -11.2762165 | down | 5.68E-17    |
| hsa-mir-133b   | -10.657723  | down | 1.09E-06    |
| hsa-mir-375    | -10.57266   | down | 6.03E-05    |
| hsa-let-7c     | -10.388263  | down | 2.04E-05    |
| hsa-mir-760    | -9.92051    | down | 1.02E-12    |
| hsa-mir-296    | -9.388603   | down | 1.38E-04    |
| hsa-mir-370    | -9.000886   | down | 2.03E-13    |
| hsa-mir-378    | -8.737416   | down | 3.01E-09    |
| hsa-mir-432    | -8.663443   | down | 2.25E-09    |
| hsa-mir-2110   | -8.566132   | down | 7.78E-11    |
| hsa-mir-205    | -8.013963   | down | 0.001158812 |
| hsa-mir-363    | -7.9215703  | down | 1.39E-06    |
| hsa-mir-181a-1 | -7.5249705  | down | 2.84E-09    |
| hsa-mir-589    | -7.2122483  | down | 1.42E-11    |
| hsa-mir-423    | -7.169264   | down | 1.15E-11    |
| hsa-mir-874    | -6.751404   | down | 1.76E-05    |
| hsa-mir-1468   | -6.6051564  | down | 5.74E-09    |
| hsa-mir-324    | -5.883902   | down | 4.73E-10    |
| hsa-mir-431    | -5.862475   | down | 3.98E-08    |
| hsa-mir-885    | -5.8277392  | down | 1.74E-11    |
| hsa-mir-937    | -5.8269687  | down | 1.45E-05    |
| hsa-mir-744    | -5.642323   | down | 9.82E-07    |
| hsa-mir-187    | -5.6009455  | down | 2.28E-05    |
| hsa-mir-92a-2  | -5.2479057  | down | 3.31E-06    |
| hsa-mir-383    | -5.2167277  | down | 1.09E-09    |
| hsa-mir-346    | -5.172708   | down | 1.88E-31    |
| hsa-mir-331    | -5.1329236  | down | 3.10E-04    |
| hsa-mir-671    | -4.994799   | down | 4.12E-10    |
| hsa-mir-1229   | -4.9548635  | down | 3.95E-10    |
| hsa-mir-484    | -4.899485   | down | 5.18E-07    |
| hsa-mir-877    | -4.6133723  | down | 6.59E-05    |
| hsa-mir-365-1  | -4.584179   | down | 6.02E-06    |
| hsa-mir-323    | -4.5467825  | down | 1.15E-05    |
| hsa-mir-1538   | -4.4786053  | down | 1.94E-27    |
| hsa-mir-891a   | -4.400809   | down | 2.98E-05    |
| hsa-mir-505    | -4.2703285  | down | 4.56E-06    |
| hsa-mir-1228   | -4.2165804  | down | 2.68E-08    |
| hsa-mir-320c-1 | -4.0962973  | down | 2.64E-11    |
| hsa-mir-20b    | -4.0940976  | down | 0.001262076 |
| hsa-mir-339    | -4.0692787  | down | 2.16E-05    |
| hsa-mir-1307   | -3.9854705  | down | 9.67E-05    |
| hsa-mir-140    | -3.7967339  | down | 2.10E-06    |
| hsa-mir-1271   | -3.618777   | down | 1.26E-04    |
| hsa-mir-887    | -3.5285904  | down | 2.61E-06    |
| hsa-mir-342    | -3.491284   | down | 3.90E-04    |
| hsa-mir-15b    | -3.4353487  | down | 4.73E-05    |
| hsa-mir-214    | -3.3951535  | down | 9.14E-04    |
| hsa-mir-487a   | -3.3621833  | down | 7.58E-06    |
| hsa-mir-132    | -3.224012   | down | 2.16E-05    |
| hsa-mir-28     | -3.1282322  | down | 7.89E-09    |
| hsa-mir-127    | -2.8960972  | down | 1.49E-04    |
| hsa-mir-658    | -2.8960013  | down | 5.57E-10    |
| hsa-mir-663b   | -2.8168721  | down | 0.003313308 |
| hsa-mir-135a-1 | -2.7820208  | down | 3.24E-06    |
| hsa-mir-1292   | -2.759025   | down | 3.55E-05    |

---

---

|               |            |      |             |
|---------------|------------|------|-------------|
| hsa-mir-455   | -2.751464  | down | 0.016525857 |
| hsa-mir-501   | -2.7253783 | down | 0.014389883 |
| hsa-mir-1301  | -2.684648  | down | 0.001770045 |
| hsa-mir-1234  | -2.5178773 | down | 3.95E-30    |
| hsa-mir-939   | -2.4398868 | down | 8.76E-05    |
| hsa-mir-1287  | -2.4396005 | down | 0.002906155 |
| hsa-mir-632   | -2.3584    | down | 6.96E-05    |
| hsa-mir-1237  | -2.326263  | down | 1.88E-22    |
| hsa-mir-18b   | -2.3011756 | down | 0.001028637 |
| hsa-mir-361   | -2.292101  | down | 0.002301976 |
| hsa-mir-202   | -2.2430816 | down | 2.53E-05    |
| hsa-mir-1227  | -2.2043328 | down | 9.34E-10    |
| hsa-mir-30d   | -2.183335  | down | 0.003102631 |
| hsa-mir-497   | -2.1412995 | down | 0.0128487   |
| hsa-mir-491   | -2.1318836 | down | 0.006817964 |
| hsa-mir-377   | -1.980699  | down | 0.017571513 |
| hsa-mir-1181  | -1.9599565 | down | 4.43E-04    |
| hsa-mir-487b  | -1.9505255 | down | 0.008613803 |
| hsa-mir-218-1 | -1.8999251 | down | 2.46E-04    |
| hsa-mir-106b  | -1.8719217 | down | 0.011739618 |
| hsa-mir-138-1 | -1.727772  | down | 0.014360772 |
| hsa-mir-770   | -1.7002965 | down | 7.84E-07    |
| hsa-mir-329-2 | -1.6802279 | down | 0.006776016 |
| hsa-mir-1910  | -1.5881958 | down | 1.66E-07    |
| hsa-mir-1908  | -1.5731761 | down | 9.39E-09    |
| hsa-mir-1914  | -1.5566725 | down | 0.001414808 |
| hsa-mir-552   | 125.86824  | up   | 2.73E-15    |
| hsa-mir-135b  | 92.44072   | up   | 3.89E-12    |
| hsa-mir-424   | 87.797104  | up   | 4.46E-19    |
| hsa-mir-215   | 74.0141    | up   | 3.09E-08    |
| hsa-mir-142   | 73.418945  | up   | 3.29E-17    |
| hsa-mir-19b-2 | 68.83364   | up   | 3.83E-20    |
| hsa-mir-374a  | 67.5058    | up   | 2.60E-27    |
| hsa-mir-577   | 63.387184  | up   | 2.07E-08    |
| hsa-mir-19a   | 60.3911    | up   | 8.56E-13    |
| hsa-mir-21    | 54.890163  | up   | 0           |
| hsa-mir-20a   | 46.65114   | up   | 9.34E-22    |
| hsa-mir-144   | 42.5793    | up   | 7.57E-12    |
| hsa-mir-335   | 41.66285   | up   | 6.43E-22    |
| hsa-mir-452   | 38.607204  | up   | 1.10E-18    |
| hsa-mir-141   | 36.88312   | up   | 1.42E-23    |
| hsa-mir-429   | 35.916325  | up   | 2.97E-16    |
| hsa-mir-16-1  | 33.6399    | up   | 9.60E-19    |
| hsa-mir-203   | 33.5487    | up   | 7.20E-13    |
| hsa-mir-192   | 30.339136  | up   | 2.72E-16    |
| hsa-mir-126   | 29.031384  | up   | 1.72E-21    |
| hsa-mir-542   | 28.02535   | up   | 1.38E-19    |
| hsa-mir-29b-1 | 27.505907  | up   | 1.02E-17    |
| hsa-mir-592   | 27.477612  | up   | 8.84E-07    |
| hsa-mir-590   | 26.95451   | up   | 5.12E-19    |
| hsa-mir-148a  | 26.470291  | up   | 5.77E-16    |
| hsa-mir-182   | 24.657486  | up   | 1.95E-14    |
| hsa-mir-15a   | 24.0329    | up   | 9.63E-23    |
| hsa-mir-98    | 24.021187  | up   | 8.69E-22    |
| hsa-mir-101-1 | 23.364975  | up   | 1.00E-21    |
| hsa-mir-379   | 21.32783   | up   | 2.48E-21    |
| hsa-mir-374b  | 20.26702   | up   | 3.46E-21    |
| hsa-mir-194-1 | 17.759962  | up   | 9.22E-16    |
| hsa-mir-1-2   | 17.396029  | up   | 3.00E-06    |
| hsa-mir-660   | 16.94982   | up   | 1.77E-17    |
| hsa-mir-889   | 16.367073  | up   | 6.09E-20    |
| hsa-mir-628   | 15.807961  | up   | 2.10E-07    |
| hsa-mir-224   | 15.315301  | up   | 5.17E-11    |
| hsa-mir-17    | 14.323981  | up   | 2.19E-15    |
| hsa-mir-153-2 | 14.219922  | up   | 1.28E-07    |

---

---

|                |            |    |             |
|----------------|------------|----|-------------|
| hsa-mir-196a-1 | 12.448104  | up | 7.73E-07    |
| hsa-mir-10a    | 12.150859  | up | 6.33E-10    |
| hsa-mir-217    | 12.046613  | up | 1.14E-06    |
| hsa-mir-196b   | 11.582685  | up | 9.77E-05    |
| hsa-mir-301a   | 11.0168915 | up | 6.16E-07    |
| hsa-mir-95     | 10.984338  | up | 3.75E-08    |
| hsa-mir-96     | 10.834814  | up | 1.67E-10    |
| hsa-mir-454    | 10.746106  | up | 9.01E-18    |
| hsa-mir-450b   | 10.014402  | up | 2.35E-09    |
| hsa-mir-582    | 9.51795    | up | 1.33E-10    |
| hsa-mir-183    | 9.238996   | up | 5.80E-08    |
| hsa-mir-369    | 9.099438   | up | 1.45E-10    |
| hsa-mir-411    | 9.001889   | up | 3.77E-09    |
| hsa-mir-223    | 8.863569   | up | 5.08E-06    |
| hsa-mir-508    | 8.845228   | up | 0.001173209 |
| hsa-mir-708    | 8.785184   | up | 3.78E-08    |
| hsa-let-7f-1   | 8.779806   | up | 1.09E-09    |
| hsa-mir-152    | 8.365665   | up | 4.48E-15    |
| hsa-mir-32     | 7.9362955  | up | 8.08E-08    |
| hsa-mir-7-1    | 7.756975   | up | 7.40E-08    |
| hsa-mir-188    | 7.717349   | up | 8.94E-07    |
| hsa-mir-451    | 7.3666644  | up | 3.86E-04    |
| hsa-mir-10b    | 7.211374   | up | 4.30E-09    |
| hsa-mir-31     | 7.122003   | up | 0.00565925  |
| hsa-mir-34a    | 6.9761076  | up | 1.53E-08    |
| hsa-mir-33a    | 6.971081   | up | 6.37E-05    |
| hsa-mir-146a   | 6.138518   | up | 5.39E-05    |
| hsa-mir-30b    | 6.1113443  | up | 3.06E-07    |
| hsa-mir-151    | 6.0227947  | up | 3.14E-13    |
| hsa-mir-199b   | 5.7899895  | up | 3.06E-05    |
| hsa-mir-653    | 5.566485   | up | 1.03E-04    |
| hsa-mir-103-2  | 5.565713   | up | 1.90E-05    |
| hsa-mir-218-2  | 5.5261154  | up | 2.65E-05    |
| hsa-mir-18a    | 5.462307   | up | 4.73E-04    |
| hsa-mir-136    | 5.3182235  | up | 1.84E-05    |
| hsa-mir-376c   | 5.22864    | up | 2.40E-06    |
| hsa-mir-493    | 5.147699   | up | 1.37E-08    |
| hsa-let-7g     | 4.9600925  | up | 1.14E-09    |
| hsa-mir-24-2   | 4.919142   | up | 3.26E-12    |
| hsa-mir-26b    | 4.8252816  | up | 5.89E-08    |
| hsa-mir-29c    | 4.5677586  | up | 1.63E-05    |
| hsa-mir-7-2    | 4.5404496  | up | 3.12E-04    |
| hsa-mir-421    | 4.5337253  | up | 7.76E-05    |
| hsa-mir-495    | 4.509793   | up | 1.13E-07    |
| hsa-mir-27a    | 4.4260273  | up | 3.79E-06    |
| hsa-mir-22     | 4.28322    | up | 1.65E-10    |
| hsa-mir-186    | 4.23124    | up | 2.52E-09    |
| hsa-mir-143    | 4.219866   | up | 2.92E-04    |
| hsa-mir-200b   | 4.196607   | up | 3.01E-06    |
| hsa-mir-26a-2  | 4.137692   | up | 3.06E-09    |
| hsa-mir-33b    | 4.0763574  | up | 0.005779905 |
| hsa-mir-425    | 4.065508   | up | 7.59E-04    |
| hsa-mir-503    | 4.0478563  | up | 0.006464281 |
| hsa-mir-181d   | 4.011771   | up | 9.89E-04    |
| hsa-mir-651    | 3.996633   | up | 9.98E-06    |
| hsa-mir-185    | 3.954062   | up | 3.96E-09    |
| hsa-mir-190    | 3.8318734  | up | 1.48E-05    |
| hsa-mir-450a-2 | 3.814068   | up | 4.54E-05    |
| hsa-mir-155    | 3.749655   | up | 2.49E-04    |
| hsa-mir-199a-2 | 3.7423735  | up | 5.95E-04    |
| hsa-mir-200a   | 3.6802692  | up | 2.47E-04    |
| hsa-mir-130a   | 3.6583018  | up | 2.48E-05    |
| hsa-mir-107    | 3.6367493  | up | 4.38E-09    |
| hsa-mir-338    | 3.5948071  | up | 0.010991716 |
| hsa-mir-7-3    | 3.572123   | up | 0.002919351 |

---



|                |           |    |             |
|----------------|-----------|----|-------------|
| hsa-mir-340    | 3.545447  | up | 3.07E-06    |
| hsa-mir-301b   | 3.5284646 | up | 0.001478936 |
| hsa-mir-627    | 3.3326344 | up | 8.22E-05    |
| hsa-mir-30e    | 3.2756462 | up | 3.80E-07    |
| hsa-mir-381    | 2.8574576 | up | 3.26E-04    |
| hsa-mir-1277   | 2.7795572 | up | 3.51E-04    |
| hsa-mir-376b   | 2.7681174 | up | 4.91E-04    |
| hsa-mir-655    | 2.7593389 | up | 3.42E-04    |
| hsa-mir-337    | 2.7227244 | up | 2.09E-04    |
| hsa-mir-576    | 2.7083774 | up | 0.002856645 |
| hsa-mir-376a-1 | 2.650357  | up | 3.30E-04    |
| hsa-mir-496    | 2.5329292 | up | 0.003536142 |
| hsa-mir-1245   | 2.3480031 | up | 0.002196955 |
| hsa-mir-556    | 2.3231072 | up | 0.006246795 |
| hsa-mir-549    | 2.3110714 | up | 0.011851881 |
| hsa-mir-29a    | 2.275791  | up | 0.002045545 |
| hsa-mir-758    | 2.2667346 | up | 0.005095392 |
| hsa-mir-25     | 2.1846185 | up | 0.003145347 |
| hsa-mir-23a    | 1.9521618 | up | 0.011320274 |
| hsa-mir-570    | 1.901412  | up | 0.012359721 |
| hsa-mir-624    | 1.8810266 | up | 0.00555362  |
| hsa-mir-643    | 1.7392855 | up | 0.012790618 |
| hsa-mir-380    | 1.7313354 | up | 0.007913949 |

**Table S3.** Differentially expressed miRNAs were analyzed in CRC cancer versus normal tissue based on TCGA data. The threshold value for upregulated and downregulated genes was a fold change  $\geq 1.5$  and  $p$ -value  $\leq 0.05$ .

| Systematic Name | FC (abs)   | Regulation | $p$      |
|-----------------|------------|------------|----------|
| hsa-miR-129-1   | -4.858034  | down       | 0        |
| hsa-miR-504     | -4.7633567 | down       | 0        |
| hsa-miR-1224    | -4.7087784 | down       | 0        |
| hsa-miR-490     | -3.7090964 | down       | 7.81E-15 |
| hsa-miR-642     | -3.4915624 | down       | 9.04E-18 |
| hsa-miR-1226    | -3.4715407 | down       | 8.96E-41 |
| hsa-miR-1249    | -3.2612455 | down       | 2.54E-36 |
| hsa-miR-433     | -3.2496326 | down       | 8.00E-39 |
| hsa-miR-605     | -3.179483  | down       | 0        |
| hsa-miR-2110    | -2.8325794 | down       | 3.50E-21 |
| hsa-miR-485     | -2.8254273 | down       | 5.03E-20 |
| hsa-miR-766     | -2.7934394 | down       | 3.71E-30 |
| hsa-miR-760     | -2.7578673 | down       | 1.37E-25 |
| hsa-miR-767     | -2.7436526 | down       | 2.46E-08 |
| hsa-miR-205     | -2.739815  | down       | 6.83E-10 |
| hsa-miR-1296    | -2.6734877 | down       | 1.50E-17 |
| hsa-miR-296     | -2.64368   | down       | 1.74E-09 |
| hsa-miR-483     | -2.6117496 | down       | 1.85E-05 |
| hsa-miR-1228    | -2.6051078 | down       | 4.97E-37 |
| hsa-miR-1306    | -2.6021512 | down       | 4.30E-24 |
| hsa-miR-326     | -2.5510483 | down       | 4.50E-14 |
| hsa-miR-1976    | -2.5414922 | down       | 4.42E-26 |
| hsa-miR-328     | -2.5343375 | down       | 6.24E-41 |
| hsa-miR-149     | -2.5233283 | down       | 2.10E-19 |
| hsa-miR-937     | -2.5119572 | down       | 2.37E-12 |
| hsa-miR-1180    | -2.4826884 | down       | 2.38E-15 |
| hsa-miR-133b    | -2.419263  | down       | 3.17E-08 |
| hsa-miR-885     | -2.372808  | down       | 0        |
| hsa-miR-487a    | -2.3506322 | down       | 1.34E-21 |
| hsa-miR-1468    | -2.291185  | down       | 1.84E-13 |
| hsa-miR-125b-2  | -2.2844684 | down       | 6.33E-09 |
| hsa-miR-139     | -2.251541  | down       | 0        |
| hsa-miR-887     | -2.2088375 | down       | 8.52E-15 |
| hsa-miR-204     | -2.207423  | down       | 1.59E-06 |
| hsa-miR-187     | -2.1849632 | down       | 1.79E-11 |

|                |            |      |             |
|----------------|------------|------|-------------|
| hsa-miR-1229   | -2.1762161 | down | 6.20E-36    |
| hsa-miR-486    | -2.138717  | down | 1.53E-25    |
| hsa-miR-363    | -2.1325169 | down | 1.33E-07    |
| hsa-miR-432    | -2.129805  | down | 2.46E-12    |
| hsa-miR-133a-2 | -2.076548  | down | 1.10E-13    |
| hsa-miR-1538   | -2.073734  | down | 0           |
| hsa-miR-877    | -2.0561497 | down | 6.97E-09    |
| hsa-miR-323    | -2.0124588 | down | 2.50E-09    |
| hsa-miR-891a   | -2.009999  | down | 9.87E-11    |
| hsa-miR-1271   | -1.9774262 | down | 2.92E-08    |
| hsa-miR-671    | -1.9576324 | down | 3.41E-19    |
| hsa-miR-1275   | -1.8874406 | down | 4.15E-05    |
| hsa-miR-1270   | -1.884741  | down | 4.46E-31    |
| hsa-miR-320c-1 | -1.873387  | down | 0           |
| hsa-miR-935    | -1.8306041 | down | 4.12E-04    |
| hsa-miR-370    | -1.8170676 | down | 2.19E-13    |
| hsa-miR-1254   | -1.7977576 | down | 1.29E-20    |
| hsa-miR-574    | -1.7972102 | down | 2.25E-32    |
| hsa-miR-615    | -1.7908909 | down | 4.36E-07    |
| hsa-miR-874    | -1.7782515 | down | 1.68E-10    |
| hsa-miR-218-1  | -1.7708175 | down | 0           |
| hsa-miR-939    | -1.7590865 | down | 4.61E-10    |
| hsa-miR-105-2  | -1.7466513 | down | 0.002273916 |
| hsa-miR-193b   | -1.719887  | down | 6.08E-18    |
| hsa-miR-346    | -1.7060112 | down | 0           |
| hsa-miR-1292   | -1.6991967 | down | 1.26E-19    |
| hsa-miR-383    | -1.6690658 | down | 4.24E-12    |
| hsa-miR-197    | -1.6630012 | down | 0           |
| hsa-miR-431    | -1.6581236 | down | 5.92E-11    |
| hsa-miR-92b    | -1.6517613 | down | 1.37E-22    |
| hsa-miR-1266   | -1.6463609 | down | 1.64E-05    |
| hsa-miR-1301   | -1.6365737 | down | 5.30E-07    |
| hsa-miR-1248   | -1.6362013 | down | 1.76E-04    |
| hsa-miR-663b   | -1.6209098 | down | 3.81E-05    |
| hsa-miR-193a   | -1.5834945 | down | 8.72E-28    |
| hsa-miR-1274b  | -1.5763532 | down | 0.003775847 |
| hsa-miR-219-1  | -1.5725294 | down | 2.62E-05    |
| hsa-miR-632    | -1.5692668 | down | 7.78E-24    |
| hsa-miR-324    | -1.556021  | down | 5.21E-21    |
| hsa-miR-125a   | -1.5363654 | down | 0           |
| hsa-miR-20b    | -1.5359448 | down | 0.004503305 |
| hsa-miR-150    | -1.5326179 | down | 5.94E-20    |
| hsa-miR-365-1  | -1.5111432 | down | 2.19E-07    |
| hsa-miR-744    | -1.5052631 | down | 8.71E-14    |
| hsa-miR-135b   | 5.9248714  | up   | 0           |
| hsa-miR-19a    | 5.448208   | up   | 0           |
| hsa-miR-577    | 5.0403543  | up   | 1.31E-35    |
| hsa-miR-19b-2  | 4.7023287  | up   | 0           |
| hsa-miR-590    | 4.478734   | up   | 0           |
| hsa-miR-144    | 4.373971   | up   | 0           |
| hsa-miR-424    | 4.232565   | up   | 0           |
| hsa-miR-592    | 3.966677   | up   | 4.23E-17    |
| hsa-miR-153-2  | 3.82902    | up   | 7.93E-40    |
| hsa-miR-708    | 3.670745   | up   | 0           |
| hsa-miR-889    | 3.6557608  | up   | 0           |
| hsa-miR-101-2  | 3.557317   | up   | 0           |
| hsa-miR-628    | 3.5299652  | up   | 6.44E-27    |
| hsa-miR-374a   | 3.5115545  | up   | 0           |
| hsa-miR-96     | 3.505476   | up   | 0           |
| hsa-miR-1-2    | 3.219226   | up   | 1.60E-27    |
| hsa-miR-542    | 3.1603498  | up   | 0           |
| hsa-miR-301a   | 3.1394703  | up   | 3.34E-22    |
| hsa-miR-217    | 3.1058514  | up   | 7.24E-35    |
| hsa-miR-454    | 3.0999076  | up   | 2.80E-45    |
| hsa-miR-98     | 3.0937862  | up   | 0           |

|                |           |    |             |
|----------------|-----------|----|-------------|
| hsa-miR-552    | 3.090351  | up | 2.25E-24    |
| hsa-miR-450b   | 3.073356  | up | 3.66E-31    |
| hsa-miR-452    | 3.0206714 | up | 0           |
| hsa-miR-369    | 2.8473043 | up | 2.78E-42    |
| hsa-miR-136    | 2.7963743 | up | 3.15E-39    |
| hsa-miR-411    | 2.7473662 | up | 1.24E-22    |
| hsa-miR-374b   | 2.6867683 | up | 0           |
| hsa-miR-660    | 2.679474  | up | 0           |
| hsa-miR-335    | 2.526943  | up | 0           |
| hsa-miR-218-2  | 2.509361  | up | 1.89E-23    |
| hsa-miR-495    | 2.4881825 | up | 1.09E-27    |
| hsa-miR-376c   | 2.452837  | up | 7.97E-16    |
| hsa-miR-32     | 2.4112337 | up | 2.00E-44    |
| hsa-miR-95     | 2.3634226 | up | 1.30E-16    |
| hsa-miR-29b-1  | 2.3240824 | up | 0           |
| hsa-miR-653    | 2.2456872 | up | 9.96E-08    |
| hsa-miR-142    | 2.2234454 | up | 0           |
| hsa-miR-188    | 2.2178683 | up | 3.40E-11    |
| hsa-miR-421    | 2.177643  | up | 7.40E-12    |
| hsa-miR-20a    | 2.1504717 | up | 0           |
| hsa-miR-582    | 2.1463692 | up | 0           |
| hsa-miR-215    | 2.1386993 | up | 6.95E-31    |
| hsa-miR-15a    | 2.1372988 | up | 0           |
| hsa-miR-190    | 2.114514  | up | 3.01E-15    |
| hsa-miR-31     | 2.084972  | up | 1.35E-04    |
| hsa-miR-598    | 2.0749962 | up | 3.47E-12    |
| hsa-let-7f-1   | 2.0264852 | up | 2.76E-36    |
| hsa-miR-106a   | 2.0253804 | up | 3.65E-09    |
| hsa-miR-33b    | 2.0148382 | up | 2.55E-06    |
| hsa-miR-340    | 1.9595792 | up | 3.84E-29    |
| hsa-miR-7-1    | 1.9589001 | up | 3.74E-34    |
| hsa-miR-337    | 1.9362608 | up | 2.85E-31    |
| hsa-miR-1977   | 1.8962864 | up | 6.47E-07    |
| hsa-miR-493    | 1.8850685 | up | 3.66E-23    |
| hsa-miR-508    | 1.8649338 | up | 1.21E-04    |
| hsa-miR-7-2    | 1.8547143 | up | 2.84E-06    |
| hsa-miR-103-2  | 1.8396531 | up | 1.13E-12    |
| hsa-miR-16-1   | 1.8114393 | up | 0           |
| hsa-miR-429    | 1.7983998 | up | 4.12E-42    |
| hsa-miR-450a-2 | 1.7933439 | up | 4.47E-07    |
| hsa-miR-651    | 1.7899704 | up | 9.32E-07    |
| hsa-miR-26a-1  | 1.7781942 | up | 0.001317235 |
| hsa-miR-7-3    | 1.7778119 | up | 1.64E-05    |
| hsa-miR-141    | 1.7770268 | up | 0           |
| hsa-miR-33a    | 1.7433052 | up | 1.67E-10    |
| hsa-miR-379    | 1.7290301 | up | 0           |
| hsa-miR-152    | 1.728595  | up | 0           |
| hsa-miR-18a    | 1.661251  | up | 4.63E-09    |
| hsa-miR-301b   | 1.6407888 | up | 2.43E-04    |
| hsa-miR-496    | 1.6023065 | up | 1.22E-05    |
| hsa-miR-224    | 1.582061  | up | 2.48E-12    |
| hsa-miR-627    | 1.5594852 | up | 1.75E-04    |
| hsa-miR-576    | 1.5593785 | up | 2.31E-07    |
| hsa-miR-126    | 1.5329307 | up | 0           |
| hsa-miR-181d   | 1.5215815 | up | 1.41E-05    |
| hsa-miR-147b   | 1.5213158 | up | 0.004936536 |

**Table S4.** Differentially expressed miRNAs were analyzed in plasma colon cancer patients versus healthy controls. The threshold value for upregulated and downregulated genes was a fold change  $\geq 1.5$  and  $p$ -value  $\leq 0.05$ .

| Systematic_Name | FC (abs)   | Regulation | $p$      |
|-----------------|------------|------------|----------|
| hsa-miR-195-5p  | -19.084541 | down       | 6.69E-15 |
| hsa-miR-96-5p   | -17.871162 | down       | 7.25E-17 |

---

|                 |            |      |             |
|-----------------|------------|------|-------------|
| hsa-miR-363-3p  | -17.0228   | down | 4.95E-07    |
| hsa-miR-4741    | -15.618946 | down | 9.97E-09    |
| hsa-miR-642b-3p | -14.030791 | down | 1.21E-06    |
| hsa-miR-374a-5p | -12.953635 | down | 6.50E-08    |
| hsa-miR-192-5p  | -12.524868 | down | 1.77E-09    |
| hsa-miR-151a-5p | -12.284961 | down | 2.13E-08    |
| hsa-miR-660-5p  | -12.08418  | down | 6.03E-08    |
| hsa-miR-134-5p  | -11.779961 | down | 1.47E-07    |
| hsa-miR-301a-3p | -11.585538 | down | 5.73E-10    |
| hsa-miR-6068    | -11.114471 | down | 1.24E-05    |
| hsa-miR-18a-5p  | -11.00917  | down | 6.07E-09    |
| hsa-miR-30b-5p  | -10.96     | down | 1.44E-06    |
| hsa-miR-126-5p  | -10.817145 | down | 1.27E-09    |
| hsa-miR-4728-5p | -10.660697 | down | 6.34E-17    |
| hsa-miR-151b    | -10.577785 | down | 3.83E-09    |
| hsa-miR-590-5p  | -10.264501 | down | 1.38E-07    |
| hsa-miR-6728-5p | -9.927017  | down | 7.78E-08    |
| hsa-miR-148a-3p | -9.923865  | down | 1.81E-06    |
| hsa-miR-5739    | -9.6984415 | down | 1.32E-05    |
| hsa-miR-425-5p  | -9.599833  | down | 4.94E-05    |
| hsa-miR-3135b   | -9.34744   | down | 2.74E-07    |
| hsa-miR-142-5p  | -9.205788  | down | 6.80E-05    |
| hsa-miR-27b-3p  | -9.011637  | down | 8.58E-06    |
| hsa-miR-215-5p  | -8.917941  | down | 2.83E-10    |
| hsa-miR-1227-5p | -8.911604  | down | 9.05E-07    |
| hsa-miR-371b-5p | -8.890483  | down | 2.09E-04    |
| hsa-miR-186-5p  | -8.877     | down | 9.09E-08    |
| hsa-miR-148b-3p | -8.662281  | down | 8.12E-09    |
| hsa-miR-575     | -8.462271  | down | 1.97E-07    |
| hsa-miR-4530    | -8.448288  | down | 0.002184228 |
| hsa-miR-642a-3p | -8.283251  | down | 0.005282057 |
| hsa-miR-324-3p  | -8.146081  | down | 2.03E-08    |
| hsa-miR-4788    | -8.133066  | down | 6.17E-10    |
| hsa-miR-4534    | -8.124963  | down | 5.27E-04    |
| hsa-miR-7-5p    | -8.020097  | down | 2.11E-11    |
| hsa-miR-5787    | -8.016673  | down | 0.00282615  |
| hsa-miR-6791-5p | -7.9281197 | down | 7.65E-04    |
| hsa-miR-4634    | -7.9260564 | down | 4.83E-05    |
| hsa-miR-3138    | -7.6574693 | down | 8.34E-09    |
| hsa-miR-331-3p  | -7.551329  | down | 3.39E-09    |
| hsa-miR-4442    | -7.527234  | down | 7.49E-06    |
| hsa-miR-6085    | -7.512024  | down | 1.05E-05    |
| hsa-miR-4443    | -7.369146  | down | 6.40E-04    |
| hsa-miR-4739    | -7.366848  | down | 5.27E-06    |
| hsa-miR-30c-5p  | -7.317877  | down | 2.99E-08    |
| hsa-miR-26b-5p  | -7.309291  | down | 2.83E-04    |
| hsa-miR-6789-5p | -7.2860436 | down | 1.23E-08    |
| hsa-miR-183-5p  | -7.085235  | down | 1.05E-13    |
| hsa-miR-374b-5p | -6.9002233 | down | 3.86E-09    |
| hsa-miR-18b-5p  | -6.844817  | down | 9.97E-09    |
| hsa-miR-7108-5p | -6.841108  | down | 1.42E-04    |
| hsa-miR-8072    | -6.722614  | down | 0.001054136 |
| hsa-miR-98-5p   | -6.7059298 | down | 2.56E-16    |
| hsa-miR-5585-3p | -6.674031  | down | 7.27E-09    |
| hsa-miR-572     | -6.480188  | down | 1.77E-07    |
| hsa-miR-128-3p  | -6.4210453 | down | 2.11E-12    |
| hsa-miR-3195    | -6.395294  | down | 7.95E-09    |
| hsa-miR-23b-3p  | -6.2139225 | down | 1.23E-05    |
| hsa-miR-630     | -6.2048616 | down | 0.021493422 |
| hsa-miR-6786-5p | -6.180855  | down | 1.71E-05    |
| hsa-miR-5703    | -6.180663  | down | 0.020989262 |
| hsa-miR-6869-5p | -6.153493  | down | 0.013190362 |
| hsa-miR-6875-5p | -6.092739  | down | 4.08E-08    |
| hsa-miR-939-5p  | -6.036088  | down | 2.99E-07    |
| hsa-miR-3679-5p | -6.0327153 | down | 0.001908814 |

---

---

|                  |            |      |             |
|------------------|------------|------|-------------|
| hsa-miR-6752-5p  | -5.923568  | down | 3.93E-04    |
| hsa-miR-718      | -5.911115  | down | 2.64E-04    |
| hsa-miR-188-5p   | -5.8806696 | down | 3.42E-13    |
| hsa-miR-1471     | -5.8774614 | down | 2.46E-07    |
| hsa-miR-6850-5p  | -5.8709145 | down | 0.011368866 |
| hsa-miR-6780b-5p | -5.8104053 | down | 4.86E-08    |
| hsa-miR-4459     | -5.7814665 | down | 0.017793614 |
| hsa-miR-454-3p   | -5.7681375 | down | 2.44E-14    |
| hsa-miR-4651     | -5.7668676 | down | 1.25E-13    |
| hsa-miR-5006-5p  | -5.750572  | down | 1.56E-06    |
| hsa-miR-199a-5p  | -5.7422247 | down | 4.67E-04    |
| hsa-miR-144-5p   | -5.700877  | down | 2.15E-09    |
| hsa-miR-3940-5p  | -5.677904  | down | 3.45E-05    |
| hsa-miR-140-5p   | -5.6675124 | down | 4.98E-07    |
| hsa-miR-6749-5p  | -5.618565  | down | 0.009301984 |
| hsa-miR-1183     | -5.497882  | down | 8.80E-08    |
| hsa-miR-8063     | -5.4752316 | down | 1.17E-06    |
| hsa-miR-7641     | -5.4738154 | down | 2.48E-04    |
| hsa-miR-146a-5p  | -5.334993  | down | 8.21E-04    |
| hsa-miR-3188     | -5.332079  | down | 1.62E-07    |
| hsa-miR-638      | -5.2982693 | down | 0.014095136 |
| hsa-miR-130b-3p  | -5.2672663 | down | 1.66E-04    |
| hsa-miR-342-3p   | -5.1831193 | down | 0.001545311 |
| hsa-miR-6763-5p  | -5.144915  | down | 1.65E-05    |
| hsa-miR-1202     | -5.112082  | down | 0.006015135 |
| hsa-miR-6893-5p  | -5.0950265 | down | 1.37E-10    |
| hsa-miR-150-3p   | -5.0198402 | down | 4.19E-08    |
| hsa-miR-4484     | -5.0191875 | down | 1.16E-07    |
| hsa-miR-340-5p   | -4.9916167 | down | 4.23E-09    |
| hsa-miR-1207-5p  | -4.966287  | down | 0.012024546 |
| hsa-miR-6829-5p  | -4.956853  | down | 1.50E-10    |
| hsa-miR-3196     | -4.953924  | down | 1.57E-05    |
| hsa-miR-548q     | -4.855887  | down | 6.94E-11    |
| hsa-miR-4463     | -4.8432555 | down | 7.50E-04    |
| hsa-miR-424-5p   | -4.806207  | down | 1.28E-05    |
| hsa-miR-3648     | -4.7944536 | down | 1.03E-10    |
| hsa-miR-1915-3p  | -4.7243605 | down | 0.016082237 |
| hsa-miR-125a-5p  | -4.711557  | down | 2.55E-08    |
| hsa-miR-3652     | -4.687598  | down | 3.71E-06    |
| hsa-miR-4271     | -4.6779494 | down | 1.36E-07    |
| hsa-miR-532-5p   | -4.670084  | down | 5.11E-11    |
| hsa-miR-4270     | -4.488763  | down | 0.012020052 |
| hsa-miR-671-5p   | -4.4687114 | down | 1.77E-07    |
| hsa-miR-6127     | -4.415358  | down | 0.002855521 |
| hsa-miR-10b-5p   | -4.410356  | down | 4.98E-09    |
| hsa-miR-6724-5p  | -4.406721  | down | 0.009369723 |
| hsa-miR-6800-5p  | -4.393602  | down | 0.02623327  |
| hsa-let-7d-3p    | -4.388507  | down | 3.35E-04    |
| hsa-miR-5195-3p  | -4.352574  | down | 4.23E-06    |
| hsa-miR-4327     | -4.319587  | down | 1.51E-05    |
| hsa-miR-484      | -4.312819  | down | 3.51E-04    |
| hsa-miR-210-3p   | -4.240125  | down | 1.94E-06    |
| hsa-miR-6812-5p  | -4.2040324 | down | 0.001743548 |
| hsa-miR-4721     | -4.1983414 | down | 4.71E-09    |
| hsa-miR-1225-5p  | -4.171139  | down | 0.021552803 |
| hsa-miR-3937     | -4.1268516 | down | 1.15E-12    |
| hsa-miR-3194-5p  | -4.124269  | down | 1.31E-10    |
| hsa-miR-6831-5p  | -4.1073184 | down | 0.009396043 |
| hsa-miR-3663-3p  | -4.0961175 | down | 0.011477044 |
| hsa-miR-345-3p   | -4.077024  | down | 1.65E-09    |
| hsa-miR-3667-5p  | -4.059849  | down | 3.52E-05    |
| hsa-miR-6858-5p  | -4.037533  | down | 4.46E-09    |
| hsa-miR-181a-5p  | -4.024414  | down | 2.87E-04    |
| hsa-miR-4745-5p  | -4.015967  | down | 5.94E-10    |
| hsa-miR-1914-3p  | -3.9975688 | down | 8.70E-18    |

---

---

|                 |            |      |             |
|-----------------|------------|------|-------------|
| hsa-miR-4499    | -3.9906962 | down | 2.26E-04    |
| hsa-miR-6879-5p | -3.9535654 | down | 0.003344605 |
| hsa-miR-3141    | -3.8921163 | down | 0.006257298 |
| hsa-miR-486-3p  | -3.861394  | down | 7.13E-12    |
| hsa-miR-335-5p  | -3.8538697 | down | 3.49E-12    |
| hsa-miR-6727-5p | -3.8398433 | down | 0.023623873 |
| hsa-miR-6794-5p | -3.8389106 | down | 0.00273704  |
| hsa-miR-2276-3p | -3.8282197 | down | 9.93E-09    |
| hsa-miR-376a-3p | -3.7756028 | down | 7.74E-07    |
| hsa-miR-4466    | -3.7644992 | down | 0.029209772 |
| hsa-miR-4787-5p | -3.756085  | down | 0.012493689 |
| hsa-miR-584-5p  | -3.7494311 | down | 5.30E-07    |
| hsa-miR-937-5p  | -3.7420526 | down | 2.52E-04    |
| hsa-miR-6126    | -3.707313  | down | 3.58E-08    |
| hsa-miR-3610    | -3.7047298 | down | 1.97E-13    |
| hsa-miR-1268b   | -3.6549137 | down | 2.13E-04    |
| hsa-miR-7847-3p | -3.6157413 | down | 0.0357677   |
| hsa-miR-6740-5p | -3.6133046 | down | 0.025256215 |
| hsa-miR-16-2-3p | -3.5953636 | down | 0.001419533 |
| hsa-miR-19a-3p  | -3.5838585 | down | 0.004304006 |
| hsa-miR-197-5p  | -3.5818837 | down | 0.028940076 |
| hsa-miR-8064    | -3.5633283 | down | 4.90E-06    |
| hsa-miR-6124    | -3.514801  | down | 0.033647396 |
| hsa-miR-29b-3p  | -3.478355  | down | 0.007268644 |
| hsa-miR-146b-5p | -3.4364433 | down | 1.04E-08    |
| hsa-miR-135a-3p | -3.4224482 | down | 1.48E-04    |
| hsa-miR-17-3p   | -3.4116976 | down | 3.45E-04    |
| hsa-miR-1249-5p | -3.373955  | down | 8.02E-07    |
| hsa-miR-30e-5p  | -3.3489783 | down | 0.01385989  |
| hsa-miR-6086    | -3.3278747 | down | 1.13E-05    |
| hsa-miR-762     | -3.3056538 | down | 0.014431517 |
| hsa-miR-4778-5p | -3.2959955 | down | 0.00267932  |
| hsa-miR-27a-3p  | -3.2275836 | down | 0.030195076 |
| hsa-miR-7845-5p | -3.21904   | down | 1.24E-07    |
| hsa-miR-15b-5p  | -3.204382  | down | 0.001744283 |
| hsa-let-7g-5p   | -3.1887221 | down | 0.001677265 |
| hsa-miR-194-5p  | -3.186671  | down | 2.10E-07    |
| hsa-miR-378i    | -3.1792    | down | 1.36E-04    |
| hsa-miR-221-3p  | -3.1278567 | down | 0.024818126 |
| hsa-let-7c-5p   | -3.1041744 | down | 0.01855364  |
| hsa-miR-2861    | -3.0810797 | down | 0.03618509  |
| hsa-miR-6756-5p | -3.0367317 | down | 9.60E-04    |
| hsa-miR-4707-3p | -3.0173829 | down | 5.37E-09    |
| hsa-miR-20b-5p  | -2.9449818 | down | 0.002139462 |
| hsa-let-7f-5p   | -2.8318105 | down | 0.02224775  |
| hsa-miR-10a-5p  | -2.8141494 | down | 1.80E-08    |
| hsa-miR-4800-5p | -2.780537  | down | 0.019083614 |
| hsa-miR-7106-5p | -2.7090771 | down | 0.01492428  |
| hsa-miR-338-3p  | -2.6697903 | down | 6.17E-04    |
| hsa-miR-652-5p  | -2.6586297 | down | 8.93E-11    |
| hsa-miR-328-3p  | -2.6507037 | down | 0.003074694 |
| hsa-miR-198     | -2.6403155 | down | 0.006110552 |
| hsa-miR-125b-5p | -2.6154964 | down | 1.75E-04    |
| hsa-miR-498     | -2.556956  | down | 8.03E-06    |
| hsa-miR-6073    | -2.5482113 | down | 7.30E-06    |
| hsa-miR-361-3p  | -2.5060644 | down | 5.56E-11    |
| hsa-miR-106b-5p | -2.4979243 | down | 0.016352372 |
| hsa-let-7a-5p   | -2.4907188 | down | 0.03822139  |
| hsa-miR-6730-5p | -2.4802718 | down | 1.60E-11    |
| hsa-miR-378a-3p | -2.4710562 | down | 2.70E-04    |
| hsa-miR-30a-5p  | -2.3956597 | down | 0.03168892  |
| hsa-miR-6075    | -2.3760273 | down | 1.43E-07    |
| hsa-miR-4429    | -2.3728902 | down | 3.18E-04    |
| hsa-miR-365a-3p | -2.364505  | down | 3.29E-06    |
| hsa-miR-3158-5p | -2.3610487 | down | 2.51E-12    |

---

|                  |            |      |             |
|------------------|------------|------|-------------|
| hsa-miR-6820-5p  | -2.3358476 | down | 3.76E-04    |
| hsa-miR-34a-5p   | -2.3222978 | down | 4.62E-04    |
| hsa-miR-557      | -2.2975543 | down | 5.81E-04    |
| hsa-miR-497-5p   | -2.2728772 | down | 7.18E-07    |
| hsa-miR-623      | -2.2431304 | down | 7.10E-04    |
| hsa-miR-6790-5p  | -2.2431083 | down | 3.62E-05    |
| hsa-let-7i-5p    | -2.2187643 | down | 1.23E-04    |
| hsa-miR-222-3p   | -2.1863503 | down | 0.036298715 |
| hsa-miR-100-5p   | -2.1320403 | down | 2.01E-06    |
| hsa-miR-4481     | -2.0843182 | down | 3.13E-10    |
| hsa-miR-15a-5p   | -2.0705006 | down | 2.32E-04    |
| hsa-miR-25-3p    | -2.0666978 | down | 0.003317509 |
| hsa-miR-20a-5p   | -2.0474055 | down | 0.001212804 |
| hsa-miR-19b-3p   | -2.0025215 | down | 0.001944795 |
| hsa-miR-139-3p   | -1.8184377 | down | 4.51E-09    |
| hsa-miR-629-5p   | -1.7804717 | down | 9.00E-05    |
| hsa-miR-3960     | -1.5608507 | down | 0.031699736 |
| hsa-miR-1228-3p  | 30.148172  | up   | 1.51E-10    |
| hsa-miR-6069     | 27.87234   | up   | 2.56E-10    |
| hsa-miR-6800-3p  | 27.269981  | up   | 2.59E-09    |
| hsa-miR-1238-3p  | 27.049736  | up   | 6.62E-10    |
| hsa-miR-6737-3p  | 25.080816  | up   | 1.15E-10    |
| hsa-miR-4730     | 24.819586  | up   | 1.78E-14    |
| hsa-miR-6716-3p  | 24.539305  | up   | 8.48E-14    |
| hsa-miR-6508-5p  | 23.8303    | up   | 5.85E-09    |
| hsa-miR-4433a-5p | 20.12776   | up   | 1.30E-10    |
| hsa-miR-451b     | 19.966757  | up   | 2.79E-08    |
| hsa-miR-5010-3p  | 19.232067  | up   | 1.62E-08    |
| hsa-miR-191-3p   | 19.044302  | up   | 1.38E-08    |
| hsa-miR-1234-3p  | 16.4659    | up   | 1.02E-07    |
| hsa-miR-3162-3p  | 16.097244  | up   | 9.02E-11    |
| hsa-miR-6797-3p  | 15.228248  | up   | 3.81E-09    |
| hsa-miR-1281     | 14.348885  | up   | 1.99E-08    |
| hsa-miR-4455     | 12.991922  | up   | 3.94E-07    |
| hsa-miR-4665-3p  | 11.097143  | up   | 4.46E-07    |
| hsa-miR-1825     | 11.092906  | up   | 1.47E-06    |
| hsa-miR-940      | 10.92399   | up   | 6.13E-08    |
| hsa-miR-574-5p   | 10.731104  | up   | 4.42E-07    |
| hsa-miR-1304-3p  | 9.837506   | up   | 6.04E-05    |
| hsa-miR-6851-3p  | 9.263779   | up   | 2.47E-05    |
| hsa-miR-4649-3p  | 9.22571    | up   | 9.86E-07    |
| hsa-miR-6751-3p  | 8.612906   | up   | 7.93E-05    |
| hsa-miR-4313     | 7.8738523  | up   | 2.13E-04    |
| hsa-miR-8485     | 6.791654   | up   | 9.09E-05    |
| hsa-miR-4725-5p  | 6.5970798  | up   | 4.73E-04    |
| hsa-miR-6870-3p  | 6.535795   | up   | 4.09E-04    |
| hsa-miR-32-3p    | 5.6060896  | up   | 3.70E-04    |
| hsa-miR-6813-3p  | 5.284001   | up   | 9.57E-04    |
| hsa-miR-7114-3p  | 5.0547495  | up   | 5.93E-04    |
| hsa-miR-4769-3p  | 4.8945293  | up   | 5.45E-04    |
| hsa-miR-4284     | 4.627779   | up   | 0.017311715 |
| hsa-miR-6834-3p  | 3.8669906  | up   | 0.005754791 |
| hsa-miR-3149     | 3.4039087  | up   | 0.006676147 |
| hsa-miR-1290     | 3.2591238  | up   | 8.33E-04    |
| hsa-miR-6861-3p  | 2.8124409  | up   | 0.010480452 |
| hsa-miR-483-3p   | 2.767849   | up   | 0.036811158 |
| hsa-miR-6515-3p  | 2.735245   | up   | 0.01791451  |
| hsa-miR-1246     | 2.6975517  | up   | 1.28E-05    |

**Table S5.** Differentially expressed miRNAs were analyzed in plasma rectal cancer patients versus healthy controls. The threshold value for upregulated and downregulated genes was a fold change  $\geq 1.5$  and  $p$ -value  $\leq 0.05$ .

| Systematic_Name | FC (abs) | Regulation | p |
|-----------------|----------|------------|---|
|-----------------|----------|------------|---|



|                 |             |      |             |
|-----------------|-------------|------|-------------|
| hsa-miR-642b-3p | -17.698948  | down | 1.47E-06    |
| hsa-miR-4741    | -17.438139  | down | 7.05E-08    |
| hsa-miR-8072    | -16.954582  | down | 6.86E-07    |
| hsa-miR-195-5p  | -16.870594  | down | 4.58E-09    |
| hsa-miR-134-5p  | -15.255262  | down | 5.22E-08    |
| hsa-miR-1227-5p | -14.240981  | down | 2.99E-08    |
| hsa-miR-7108-5p | -14.102511  | down | 6.90E-08    |
| hsa-miR-6728-5p | -14.047849  | down | 3.49E-09    |
| hsa-miR-6850-5p | -13.927513  | down | 0.001009182 |
| hsa-miR-142-5p  | -13.260134  | down | 2.65E-05    |
| hsa-miR-192-5p  | -13.208113  | down | 7.88E-08    |
| hsa-miR-4443    | -12.575873  | down | 1.72E-04    |
| hsa-miR-6791-5p | -12.162286  | down | 6.91E-05    |
| hsa-miR-96-5p   | -12.051468  | down | 1.45E-07    |
| hsa-miR-374a-5p | -11.6988325 | down | 3.30E-06    |
| hsa-miR-575     | -11.611312  | down | 3.78E-09    |
| hsa-miR-642a-3p | -11.417184  | down | 0.002989296 |
| hsa-miR-425-5p  | -11.215559  | down | 1.19E-04    |
| hsa-miR-215-5p  | -10.99455   | down | 3.25E-10    |
| hsa-miR-6068    | -10.839542  | down | 4.42E-05    |
| hsa-miR-1202    | -10.496189  | down | 7.10E-04    |
| hsa-miR-3663-3p | -10.39162   | down | 7.32E-04    |
| hsa-miR-186-5p  | -10.336495  | down | 1.31E-07    |
| hsa-miR-151b    | -10.250122  | down | 6.31E-07    |
| hsa-miR-4530    | -10.217537  | down | 0.001127996 |
| hsa-miR-4739    | -9.975182   | down | 1.35E-06    |
| hsa-miR-5787    | -9.938442   | down | 0.001432164 |
| hsa-miR-660-5p  | -9.838545   | down | 4.02E-05    |
| hsa-miR-144-3p  | -9.739871   | down | 9.79E-05    |
| hsa-miR-4270    | -9.561591   | down | 0.001424078 |
| hsa-miR-363-3p  | -9.393585   | down | 2.50E-04    |
| hsa-miR-30b-5p  | -9.281387   | down | 2.96E-05    |
| hsa-miR-371b-5p | -9.27924    | down | 1.44E-04    |
| hsa-miR-126-5p  | -9.248106   | down | 3.47E-06    |
| hsa-miR-4788    | -9.179674   | down | 1.21E-08    |
| hsa-miR-6789-5p | -9.112293   | down | 9.14E-10    |
| hsa-miR-1225-5p | -9.099518   | down | 0.002235186 |
| hsa-miR-6749-5p | -9.080338   | down | 0.002189587 |
| hsa-miR-4728-5p | -8.935863   | down | 2.09E-08    |
| hsa-miR-6727-5p | -8.881601   | down | 0.002929077 |
| hsa-miR-6786-5p | -8.806383   | down | 6.19E-08    |
| hsa-miR-4463    | -8.784044   | down | 7.57E-07    |
| hsa-miR-5703    | -8.719135   | down | 0.007174332 |
| hsa-miR-3138    | -8.674742   | down | 7.74E-09    |
| hsa-miR-4534    | -8.667723   | down | 6.05E-04    |
| hsa-miR-148a-3p | -8.302392   | down | 3.57E-05    |
| hsa-miR-331-3p  | -8.24382    | down | 2.51E-08    |
| hsa-miR-1207-5p | -8.105125   | down | 0.00282465  |
| hsa-miR-18a-5p  | -8.014106   | down | 3.27E-05    |
| hsa-miR-26b-5p  | -8.005609   | down | 0.00283016  |
| hsa-miR-3135b   | -7.968773   | down | 2.83E-04    |
| hsa-miR-630     | -7.815078   | down | 0.01052535  |
| hsa-miR-638     | -7.79626    | down | 0.004056337 |
| hsa-miR-3195    | -7.7535725  | down | 3.36E-09    |
| hsa-miR-5006-5p | -7.744547   | down | 1.52E-09    |
| hsa-miR-6763-5p | -7.740162   | down | 3.02E-07    |
| hsa-miR-939-5p  | -7.729882   | down | 1.52E-08    |
| hsa-miR-374b-5p | -7.622873   | down | 2.56E-08    |
| hsa-miR-6085    | -7.592694   | down | 8.26E-06    |
| hsa-miR-4763-3p | -7.4306207  | down | 0.00547572  |
| hsa-miR-30d-5p  | -7.341276   | down | 0.002968174 |
| hsa-miR-8063    | -7.2326727  | down | 2.23E-07    |
| hsa-miR-301a-3p | -7.193112   | down | 9.35E-06    |
| hsa-miR-4634    | -6.9415817  | down | 2.55E-04    |
| hsa-miR-3652    | -6.9143744  | down | 3.32E-11    |



---

|                  |            |      |             |
|------------------|------------|------|-------------|
| hsa-miR-128-3p   | -6.899596  | down | 1.37E-11    |
| hsa-miR-30c-5p   | -6.8739023 | down | 1.23E-06    |
| hsa-miR-572      | -6.800901  | down | 1.10E-06    |
| hsa-miR-328-5p   | -6.7855115 | down | 0.009398649 |
| hsa-miR-148b-3p  | -6.721095  | down | 7.72E-06    |
| hsa-miR-1471     | -6.668908  | down | 1.20E-07    |
| hsa-miR-4442     | -6.579573  | down | 4.75E-05    |
| hsa-miR-340-5p   | -6.5751534 | down | 3.13E-11    |
| hsa-miR-718      | -6.5650353 | down | 2.40E-04    |
| hsa-miR-6775-5p  | -6.5413365 | down | 0.002351017 |
| hsa-miR-5585-3p  | -6.506056  | down | 5.27E-07    |
| hsa-miR-188-5p   | -6.5043764 | down | 2.47E-13    |
| hsa-miR-4651     | -6.5019174 | down | 3.69E-15    |
| hsa-miR-27b-3p   | -6.4907494 | down | 3.24E-04    |
| hsa-miR-1915-3p  | -6.462355  | down | 0.003776004 |
| hsa-miR-6724-5p  | -6.436633  | down | 0.001846714 |
| hsa-miR-4484     | -6.413649  | down | 1.69E-10    |
| hsa-miR-1183     | -6.3106236 | down | 2.49E-08    |
| hsa-miR-4466     | -6.267067  | down | 0.004932348 |
| hsa-miR-3679-5p  | -6.215233  | down | 0.003274665 |
| hsa-miR-342-3p   | -6.2028785 | down | 1.21E-04    |
| hsa-miR-23b-3p   | -6.16741   | down | 1.04E-04    |
| hsa-let-7d-3p    | -6.1399474 | down | 4.92E-06    |
| hsa-miR-4499     | -6.088096  | down | 1.92E-06    |
| hsa-miR-3648     | -6.080401  | down | 1.11E-11    |
| hsa-miR-26a-5p   | -6.0503063 | down | 0.008451654 |
| hsa-miR-1268b    | -6.016851  | down | 1.30E-06    |
| hsa-miR-3188     | -5.9901266 | down | 7.56E-08    |
| hsa-miR-6893-5p  | -5.9056025 | down | 9.92E-13    |
| hsa-miR-151a-3p  | -5.877762  | down | 4.19E-06    |
| hsa-miR-6752-5p  | -5.8430524 | down | 0.001357136 |
| hsa-miR-3196     | -5.8197455 | down | 2.34E-06    |
| hsa-miR-454-3p   | -5.793686  | down | 1.20E-08    |
| hsa-miR-7-5p     | -5.74208   | down | 3.30E-05    |
| hsa-miR-5739     | -5.6902986 | down | 6.16E-04    |
| hsa-miR-4787-5p  | -5.620427  | down | 0.001065759 |
| hsa-miR-4721     | -5.580764  | down | 2.46E-15    |
| hsa-miR-6829-5p  | -5.5240984 | down | 5.12E-11    |
| hsa-miR-4327     | -5.5043283 | down | 3.11E-07    |
| hsa-miR-130b-3p  | -5.5023494 | down | 1.87E-04    |
| hsa-miR-5195-3p  | -5.411947  | down | 2.08E-07    |
| hsa-miR-150-3p   | -5.4075403 | down | 1.71E-07    |
| hsa-miR-548q     | -5.400439  | down | 4.48E-11    |
| hsa-miR-125a-5p  | -5.347823  | down | 6.49E-08    |
| hsa-miR-4271     | -5.295589  | down | 2.69E-08    |
| hsa-miR-6812-5p  | -5.2812304 | down | 5.94E-05    |
| hsa-miR-6869-5p  | -5.2776175 | down | 0.030215487 |
| hsa-miR-6124     | -5.27679   | down | 0.008558582 |
| hsa-miR-3940-5p  | -5.2688847 | down | 8.79E-05    |
| hsa-miR-1229-5p  | -5.0768313 | down | 0.009309867 |
| hsa-miR-183-5p   | -5.051148  | down | 4.69E-06    |
| hsa-miR-3667-5p  | -5.045067  | down | 2.40E-06    |
| hsa-miR-937-5p   | -5.0117774 | down | 1.21E-05    |
| hsa-miR-6780b-5p | -4.9605746 | down | 1.66E-04    |
| hsa-miR-671-5p   | -4.9200864 | down | 1.76E-07    |
| hsa-miR-4459     | -4.9040217 | down | 0.006731615 |
| hsa-miR-6879-5p  | -4.844546  | down | 3.84E-04    |
| hsa-miR-7641     | -4.825062  | down | 0.00478969  |
| hsa-miR-3194-5p  | -4.818217  | down | 3.57E-15    |
| hsa-miR-6126     | -4.8168564 | down | 5.04E-12    |
| hsa-miR-6785-5p  | -4.7778673 | down | 0.008942611 |
| hsa-miR-7150     | -4.759289  | down | 0.035733562 |
| hsa-miR-6875-5p  | -4.7458205 | down | 0.003345262 |
| hsa-miR-8064     | -4.740493  | down | 8.50E-09    |
| hsa-miR-181a-5p  | -4.721017  | down | 2.63E-04    |

---

---

|                 |            |      |             |
|-----------------|------------|------|-------------|
| hsa-miR-3656    | -4.7097487 | down | 0.016498437 |
| hsa-miR-6127    | -4.6833744 | down | 0.002618671 |
| hsa-miR-324-5p  | -4.6811886 | down | 7.56E-07    |
| hsa-miR-590-5p  | -4.665492  | down | 0.003303035 |
| hsa-miR-6858-5p | -4.665387  | down | 2.15E-11    |
| hsa-miR-4745-5p | -4.6496744 | down | 4.92E-12    |
| hsa-miR-30e-5p  | -4.638218  | down | 0.009462235 |
| hsa-miR-1914-3p | -4.6320653 | down | 1.23E-19    |
| hsa-miR-27a-3p  | -4.588405  | down | 0.008616984 |
| hsa-miR-140-5p  | -4.5777035 | down | 1.23E-04    |
| hsa-miR-4687-3p | -4.534422  | down | 0.039401792 |
| hsa-miR-6756-5p | -4.5099926 | down | 1.11E-05    |
| hsa-miR-345-3p  | -4.501176  | down | 1.12E-09    |
| hsa-miR-135a-3p | -4.4671125 | down | 3.49E-05    |
| hsa-miR-6794-5p | -4.4656944 | down | 4.16E-04    |
| hsa-miR-19a-3p  | -4.4238    | down | 0.013169073 |
| hsa-miR-18b-5p  | -4.3512444 | down | 7.64E-05    |
| hsa-miR-199a-5p | -4.3336153 | down | 0.005794328 |
| hsa-miR-1249-5p | -4.32165   | down | 4.57E-09    |
| hsa-miR-584-5p  | -4.3162    | down | 1.27E-08    |
| hsa-miR-3937    | -4.290447  | down | 1.14E-09    |
| hsa-miR-2276-3p | -4.2245    | down | 5.19E-09    |
| hsa-miR-10b-5p  | -4.153251  | down | 2.57E-07    |
| hsa-miR-532-5p  | -4.112886  | down | 4.63E-06    |
| hsa-miR-7845-5p | -4.1087456 | down | 7.89E-11    |
| hsa-miR-210-3p  | -4.0628104 | down | 3.96E-04    |
| hsa-miR-320a    | -4.047538  | down | 0.019352725 |
| hsa-miR-6800-5p | -3.992329  | down | 0.014373192 |
| hsa-miR-7106-5p | -3.9794679 | down | 7.69E-04    |
| hsa-miR-762     | -3.962642  | down | 0.007135358 |
| hsa-miR-376a-3p | -3.7817614 | down | 2.87E-05    |
| hsa-miR-6086    | -3.7762034 | down | 1.37E-06    |
| hsa-miR-484     | -3.7688918 | down | 0.004909118 |
| hsa-miR-146a-5p | -3.7541137 | down | 0.012143113 |
| hsa-miR-30a-5p  | -3.6294549 | down | 1.35E-04    |
| hsa-miR-320b    | -3.612441  | down | 0.038985133 |
| hsa-miR-378i    | -3.6068876 | down | 1.95E-05    |
| hsa-miR-335-5p  | -3.5446124 | down | 8.81E-08    |
| hsa-miR-197-5p  | -3.5375495 | down | 0.013917983 |
| hsa-miR-146b-5p | -3.5189464 | down | 7.29E-07    |
| hsa-miR-2861    | -3.4493215 | down | 0.014101845 |
| hsa-miR-198     | -3.4323826 | down | 2.04E-04    |
| hsa-miR-424-5p  | -3.3857808 | down | 0.001470275 |
| hsa-miR-106b-5p | -3.3380468 | down | 0.009031892 |
| hsa-miR-194-5p  | -3.3178694 | down | 5.41E-07    |
| hsa-miR-2392    | -3.2619255 | down | 0.020649794 |
| hsa-miR-5001-5p | -3.2328167 | down | 0.027117865 |
| hsa-miR-4707-3p | -3.2270503 | down | 8.88E-08    |
| hsa-miR-338-3p  | -3.1831071 | down | 4.55E-05    |
| hsa-miR-7704    | -3.1803765 | down | 0.031313114 |
| hsa-miR-17-3p   | -3.1761377 | down | 0.004250472 |
| hsa-miR-652-5p  | -3.1549861 | down | 2.76E-14    |
| hsa-miR-3141    | -3.1356945 | down | 0.015659565 |
| hsa-miR-4778-5p | -3.1171834 | down | 0.008131617 |
| hsa-miR-3665    | -3.0952525 | down | 0.041360788 |
| hsa-miR-3610    | -3.0642486 | down | 2.63E-05    |
| hsa-miR-557     | -3.060216  | down | 8.06E-08    |
| hsa-miR-98-5p   | -2.997998  | down | 0.002315295 |
| hsa-miR-498     | -2.995054  | down | 1.46E-07    |
| hsa-miR-125b-5p | -2.988829  | down | 1.35E-05    |
| hsa-miR-4800-5p | -2.9831712 | down | 0.016404362 |
| hsa-miR-6790-5p | -2.9542782 | down | 1.16E-16    |
| hsa-miR-221-3p  | -2.9496    | down | 0.03162353  |
| hsa-miR-6075    | -2.9324594 | down | 1.11E-13    |
| hsa-miR-378a-3p | -2.9291847 | down | 7.36E-06    |

---

|                  |            |      |             |
|------------------|------------|------|-------------|
| hsa-miR-34a-5p   | -2.927698  | down | 1.11E-06    |
| hsa-miR-623      | -2.924685  | down | 3.93E-07    |
| hsa-miR-6820-5p  | -2.9161675 | down | 2.88E-07    |
| hsa-miR-365a-3p  | -2.8485901 | down | 4.35E-08    |
| hsa-miR-6730-5p  | -2.8261933 | down | 3.08E-11    |
| hsa-miR-486-3p   | -2.7457156 | down | 2.06E-04    |
| hsa-miR-3158-5p  | -2.69376   | down | 4.57E-14    |
| hsa-miR-10a-5p   | -2.6498177 | down | 6.24E-06    |
| hsa-miR-4429     | -2.6189446 | down | 9.07E-05    |
| hsa-miR-15b-5p   | -2.5906572 | down | 7.21E-04    |
| hsa-miR-361-3p   | -2.5072474 | down | 1.52E-07    |
| hsa-miR-29b-3p   | -2.4845538 | down | 0.036073163 |
| hsa-miR-222-3p   | -2.4703245 | down | 0.01965298  |
| hsa-miR-497-5p   | -2.4539943 | down | 1.01E-07    |
| hsa-miR-4481     | -2.3321133 | down | 1.57E-09    |
| hsa-miR-100-5p   | -2.313144  | down | 3.58E-06    |
| hsa-miR-3960     | -2.2312152 | down | 0.001537408 |
| hsa-let-7g-5p    | -2.1676872 | down | 0.022192793 |
| hsa-miR-19b-3p   | -2.1611707 | down | 0.008539365 |
| hsa-miR-139-3p   | -2.0268016 | down | 2.31E-09    |
| hsa-miR-6779-5p  | -2.014083  | down | 0.019162955 |
| hsa-miR-20b-5p   | -1.9796937 | down | 0.010479953 |
| hsa-miR-629-5p   | -1.8917848 | down | 8.69E-06    |
| hsa-miR-15a-5p   | -1.8419242 | down | 0.001552703 |
| hsa-miR-20a-5p   | -1.61354   | down | 0.02919387  |
| hsa-miR-29c-3p   | -1.5472715 | down | 0.016652932 |
| hsa-miR-6508-5p  | 44.94544   | up   | 6.03E-12    |
| hsa-miR-6800-3p  | 42.488583  | up   | 2.66E-11    |
| hsa-miR-451b     | 40.17751   | up   | 7.25E-12    |
| hsa-miR-1228-3p  | 38.353195  | up   | 7.91E-11    |
| hsa-miR-1238-3p  | 34.811417  | up   | 4.82E-11    |
| hsa-miR-4730     | 34.731014  | up   | 1.34E-11    |
| hsa-miR-6069     | 34.25672   | up   | 2.10E-10    |
| hsa-miR-6716-3p  | 33.76955   | up   | 3.28E-11    |
| hsa-miR-5010-3p  | 31.934872  | up   | 1.68E-10    |
| hsa-miR-191-3p   | 31.08507   | up   | 8.26E-11    |
| hsa-miR-1234-3p  | 30.505447  | up   | 1.99E-10    |
| hsa-miR-6737-3p  | 29.85762   | up   | 2.50E-10    |
| hsa-miR-4455     | 28.234776  | up   | 2.65E-09    |
| hsa-miR-4433a-5p | 24.42316   | up   | 8.13E-10    |
| hsa-miR-1281     | 24.314016  | up   | 3.42E-09    |
| hsa-miR-3162-3p  | 23.158672  | up   | 9.54E-11    |
| hsa-miR-574-5p   | 22.594849  | up   | 7.79E-10    |
| hsa-miR-6797-3p  | 21.93045   | up   | 1.34E-09    |
| hsa-miR-1825     | 20.717909  | up   | 5.68E-09    |
| hsa-miR-6751-3p  | 19.310602  | up   | 1.27E-06    |
| hsa-miR-4665-3p  | 15.921819  | up   | 6.51E-09    |
| hsa-miR-6813-3p  | 15.844627  | up   | 1.86E-07    |
| hsa-miR-8485     | 15.750625  | up   | 2.02E-07    |
| hsa-miR-940      | 15.240282  | up   | 1.13E-08    |
| hsa-miR-6851-3p  | 14.757802  | up   | 2.81E-07    |
| hsa-miR-3149     | 14.740364  | up   | 4.66E-06    |
| hsa-miR-4313     | 14.07879   | up   | 1.94E-05    |
| hsa-miR-32-3p    | 13.450186  | up   | 1.32E-06    |
| hsa-miR-6834-3p  | 11.825755  | up   | 2.01E-05    |
| hsa-miR-4769-3p  | 10.706     | up   | 1.11E-05    |
| hsa-miR-4725-5p  | 10.448515  | up   | 2.11E-04    |
| hsa-miR-4649-3p  | 10.081085  | up   | 4.32E-05    |
| hsa-miR-483-3p   | 10.046119  | up   | 1.28E-05    |
| hsa-miR-1304-3p  | 9.078493   | up   | 1.94E-04    |
| hsa-miR-6870-3p  | 9.036732   | up   | 3.87E-05    |
| hsa-miR-6515-3p  | 8.509136   | up   | 1.23E-04    |
| hsa-miR-7114-3p  | 7.2395573  | up   | 2.39E-04    |
| hsa-miR-4290     | 6.2279506  | up   | 0.001038709 |
| hsa-miR-6861-3p  | 5.682808   | up   | 0.001392494 |

|                  |           |    |             |
|------------------|-----------|----|-------------|
| hsa-miR-1290     | 5.4939084 | up | 2.33E-04    |
| hsa-miR-6739-5p  | 5.270004  | up | 1.19E-04    |
| hsa-miR-1246     | 4.7447033 | up | 1.65E-06    |
| hsa-miR-4284     | 4.4530253 | up | 0.008798013 |
| hsa-miR-4749-3p  | 3.8275385 | up | 0.003176451 |
| hsa-miR-1273g-3p | 3.442122  | up | 0.001952466 |
| hsa-miR-6819-3p  | 3.2139478 | up | 0.031974927 |
| hsa-miR-548c-3p  | 2.5497031 | up | 0.018937416 |
| hsa-miR-6766-3p  | 2.530503  | up | 0.026634071 |
| hsa-miR-1224-3p  | 2.112045  | up | 0.014022677 |

**Table S6.** Differentially expressed miRNAs were analyzed in plasma colorectal cancer patients versus healthy controls. The threshold value for upregulated and downregulated genes was a fold change  $\geq 1.5$  and  $p$ -value  $\leq 0.05$ .

| Systematic_Name | FC (abs)   | Regulation | p           |
|-----------------|------------|------------|-------------|
| hsa-miR-195-5p  | -18.817083 | down       | 6.57E-17    |
| hsa-miR-96-5p   | -16.276388 | down       | 2.54E-18    |
| hsa-miR-4741    | -16.049957 | down       | 7.21E-10    |
| hsa-miR-363-3p  | -15.419561 | down       | 9.54E-07    |
| hsa-miR-642b-3p | -14.913443 | down       | 1.99E-07    |
| hsa-miR-134-5p  | -13.088778 | down       | 2.41E-09    |
| hsa-miR-192-5p  | -12.807455 | down       | 9.69E-11    |
| hsa-miR-374a-5p | -11.839737 | down       | 1.20E-07    |
| hsa-miR-660-5p  | -11.375271 | down       | 2.03E-07    |
| hsa-miR-6068    | -11.091023 | down       | 4.17E-06    |
| hsa-miR-6728-5p | -10.82846  | down       | 6.99E-10    |
| hsa-miR-425-5p  | -10.548464 | down       | 3.01E-05    |
| hsa-miR-142-5p  | -10.319482 | down       | 3.09E-05    |
| hsa-miR-30b-5p  | -10.255639 | down       | 8.51E-07    |
| hsa-miR-151a-5p | -10.212569 | down       | 9.21E-08    |
| hsa-miR-215-5p  | -10.07147  | down       | 1.39E-14    |
| hsa-miR-126-5p  | -10.044064 | down       | 1.81E-09    |
| hsa-miR-1227-5p | -9.993745  | down       | 1.30E-08    |
| hsa-miR-151b    | -9.945766  | down       | 1.97E-09    |
| hsa-miR-301a-3p | -9.706256  | down       | 4.01E-09    |
| hsa-miR-6791-5p | -9.649806  | down       | 1.66E-04    |
| hsa-miR-18a-5p  | -9.370826  | down       | 1.17E-07    |
| hsa-miR-148a-3p | -9.130793  | down       | 2.65E-06    |
| hsa-miR-186-5p  | -9.109111  | down       | 1.06E-08    |
| hsa-miR-642a-3p | -9.106543  | down       | 0.003948664 |
| hsa-miR-371b-5p | -9.037191  | down       | 9.12E-05    |
| hsa-miR-4534    | -8.788887  | down       | 2.58E-04    |
| hsa-miR-8072    | -8.701094  | down       | 6.08E-05    |
| hsa-miR-4728-5p | -8.697706  | down       | 4.50E-17    |
| hsa-miR-7108-5p | -8.57047   | down       | 6.65E-06    |
| hsa-miR-4443    | -8.552064  | down       | 2.72E-04    |
| hsa-miR-4530    | -8.535406  | down       | 0.001600046 |
| hsa-miR-5787    | -8.417286  | down       | 0.001988932 |
| hsa-miR-575     | -8.3517    | down       | 2.95E-09    |
| hsa-miR-27b-3p  | -8.132425  | down       | 1.01E-05    |
| hsa-miR-6850-5p | -8.059588  | down       | 0.003773439 |
| hsa-miR-26b-5p  | -8.017587  | down       | 3.80E-04    |
| hsa-miR-4788    | -7.9594493 | down       | 2.28E-11    |
| hsa-miR-5739    | -7.921967  | down       | 2.98E-05    |
| hsa-miR-4634    | -7.9133234 | down       | 1.81E-05    |
| hsa-miR-3135b   | -7.6615214 | down       | 1.44E-06    |
| hsa-miR-331-3p  | -7.6080284 | down       | 7.00E-11    |
| hsa-miR-4739    | -7.5708833 | down       | 1.01E-06    |
| hsa-miR-590-5p  | -7.522014  | down       | 1.49E-05    |
| hsa-miR-148b-3p | -7.456761  | down       | 3.13E-08    |
| hsa-miR-3138    | -7.438351  | down       | 1.89E-10    |
| hsa-miR-6789-5p | -7.3977494 | down       | 5.61E-11    |
| hsa-miR-6085    | -7.253052  | down       | 3.15E-06    |

---

|                  |            |      |             |
|------------------|------------|------|-------------|
| hsa-miR-7-5p     | -7.178249  | down | 1.89E-10    |
| hsa-miR-6749-5p  | -7.141727  | down | 0.004406519 |
| hsa-miR-374b-5p  | -7.032165  | down | 1.71E-11    |
| hsa-miR-30c-5p   | -7.006509  | down | 6.52E-09    |
| hsa-miR-4442     | -6.8117385 | down | 5.20E-06    |
| hsa-miR-1202     | -6.8062596 | down | 0.002387004 |
| hsa-miR-5703     | -6.7925115 | down | 0.013649669 |
| hsa-miR-6786-5p  | -6.572998  | down | 8.41E-07    |
| hsa-miR-630      | -6.5669317 | down | 0.0160374   |
| hsa-miR-3195     | -6.4262743 | down | 1.01E-10    |
| hsa-miR-3663-3p  | -6.298948  | down | 0.002452866 |
| hsa-miR-128-3p   | -6.2682095 | down | 3.41E-15    |
| hsa-miR-183-5p   | -6.2638874 | down | 7.16E-14    |
| hsa-miR-718      | -6.1670556 | down | 1.01E-04    |
| hsa-miR-939-5p   | -6.1567235 | down | 5.99E-09    |
| hsa-miR-572      | -6.143451  | down | 1.10E-08    |
| hsa-miR-638      | -6.0846047 | down | 0.007724057 |
| hsa-miR-3679-5p  | -6.0663605 | down | 0.001795867 |
| hsa-miR-4270     | -6.0591116 | down | 0.004546233 |
| hsa-miR-5585-3p  | -5.979514  | down | 1.48E-09    |
| hsa-miR-23b-3p   | -5.931212  | down | 9.71E-06    |
| hsa-miR-6752-5p  | -5.9222207 | down | 2.56E-04    |
| hsa-miR-4463     | -5.82371   | down | 4.17E-05    |
| hsa-miR-1225-5p  | -5.7989573 | down | 0.008056652 |
| hsa-miR-18b-5p   | -5.7592382 | down | 6.40E-08    |
| hsa-miR-1207-5p  | -5.6783795 | down | 0.007325315 |
| hsa-miR-1471     | -5.667467  | down | 8.00E-09    |
| hsa-miR-5006-5p  | -5.6112366 | down | 1.51E-08    |
| hsa-miR-1915-3p  | -5.538143  | down | 0.008179117 |
| hsa-miR-6763-5p  | -5.5240726 | down | 6.74E-07    |
| hsa-miR-8063     | -5.5046577 | down | 8.57E-08    |
| hsa-miR-188-5p   | -5.4637866 | down | 2.37E-17    |
| hsa-miR-3940-5p  | -5.455228  | down | 1.55E-05    |
| hsa-miR-6869-5p  | -5.454521  | down | 0.020603845 |
| hsa-miR-342-3p   | -5.4326143 | down | 5.38E-04    |
| hsa-miR-6727-5p  | -5.409926  | down | 0.008533103 |
| hsa-miR-4651     | -5.385709  | down | 6.31E-18    |
| hsa-miR-4459     | -5.376338  | down | 0.013653612 |
| hsa-miR-454-3p   | -5.3466787 | down | 1.26E-15    |
| hsa-miR-130b-3p  | -5.339442  | down | 7.91E-05    |
| hsa-miR-3188     | -5.2901726 | down | 4.60E-09    |
| hsa-miR-1183     | -5.266278  | down | 1.14E-09    |
| hsa-miR-6724-5p  | -5.1408005 | down | 0.004485659 |
| hsa-miR-3652     | -5.0073633 | down | 1.92E-08    |
| hsa-miR-4484     | -4.959791  | down | 3.91E-10    |
| hsa-miR-340-5p   | -4.958847  | down | 4.22E-11    |
| hsa-miR-140-5p   | -4.9532743 | down | 4.18E-06    |
| hsa-miR-3196     | -4.940166  | down | 2.50E-06    |
| hsa-miR-6780b-5p | -4.9353385 | down | 5.51E-07    |
| hsa-miR-98-5p    | -4.8731217 | down | 6.04E-09    |
| hsa-miR-4466     | -4.7887235 | down | 0.012988478 |
| hsa-miR-199a-5p  | -4.7726145 | down | 0.001234816 |
| hsa-miR-150-3p   | -4.7547145 | down | 2.23E-09    |
| hsa-miR-4763-3p  | -4.709969  | down | 0.021727553 |
| hsa-miR-6127     | -4.6826367 | down | 0.001969452 |
| hsa-miR-6893-5p  | -4.6469536 | down | 6.91E-14    |
| hsa-miR-548q     | -4.6302056 | down | 1.93E-14    |
| hsa-miR-125a-5p  | -4.6221566 | down | 6.85E-11    |
| hsa-miR-6829-5p  | -4.5898786 | down | 8.70E-14    |
| hsa-let-7d-3p    | -4.5557494 | down | 9.23E-05    |
| hsa-miR-146a-5p  | -4.545061  | down | 0.002496355 |
| hsa-miR-6800-5p  | -4.518268  | down | 0.016603379 |
| hsa-miR-4271     | -4.5100737 | down | 3.17E-09    |
| hsa-miR-6875-5p  | -4.438074  | down | 2.08E-05    |
| hsa-miR-324-5p   | -4.4222517 | down | 4.73E-09    |

---

---

|                   |            |      |             |
|-------------------|------------|------|-------------|
| hsa-miR-532-5p    | -4.402987  | down | 7.14E-12    |
| hsa-miR-5195-3p   | -4.365667  | down | 2.60E-07    |
| hsa-miR-7641      | -4.343594  | down | 0.001507537 |
| hsa-miR-144-5p    | -4.3235927 | down | 1.09E-05    |
| hsa-miR-4499      | -4.2906756 | down | 2.32E-05    |
| hsa-miR-3648      | -4.2686577 | down | 2.90E-14    |
| hsa-miR-671-5p    | -4.2634115 | down | 9.26E-09    |
| hsa-miR-4327      | -4.2425714 | down | 1.16E-06    |
| hsa-miR-6812-5p   | -4.196215  | down | 5.73E-04    |
| hsa-miR-424-5p    | -4.1724997 | down | 3.34E-05    |
| hsa-miR-10b-5p    | -4.1393824 | down | 2.41E-10    |
| hsa-miR-19a-3p    | -4.128786  | down | 0.004145203 |
| hsa-miR-6775-5p   | -4.12333   | down | 0.020697972 |
| hsa-miR-210-3p    | -4.1130724 | down | 3.12E-06    |
| hsa-miR-3667-5p   | -4.092896  | down | 2.88E-06    |
| hsa-miR-6794-5p   | -4.0526137 | down | 8.61E-04    |
| hsa-miR-1268b     | -4.0522842 | down | 2.28E-05    |
| hsa-miR-484       | -3.9926472 | down | 9.02E-04    |
| hsa-miR-937-5p    | -3.9748037 | down | 4.57E-05    |
| hsa-miR-197-5p    | -3.968531  | down | 0.016957127 |
| hsa-miR-6124      | -3.9442096 | down | 0.021335324 |
| hsa-miR-181a-5p   | -3.9428988 | down | 2.54E-04    |
| hsa-miR-376c-3p   | -3.9367557 | down | 3.87E-08    |
| hsa-miR-6879-5p   | -3.9321866 | down | 0.001633666 |
| hsa-miR-345-3p    | -3.8832836 | down | 1.82E-12    |
| hsa-miR-3194-5p   | -3.8685493 | down | 7.96E-14    |
| hsa-miR-4721      | -3.8504777 | down | 9.05E-12    |
| hsa-miR-3937      | -3.8199637 | down | 8.74E-17    |
| hsa-miR-8064      | -3.730656  | down | 2.57E-08    |
| hsa-miR-6858-5p   | -3.7172866 | down | 9.27E-12    |
| hsa-miR-2276-3p   | -3.7057345 | down | 1.40E-11    |
| hsa-miR-376a-3p   | -3.6979203 | down | 2.42E-08    |
| hsa-miR-4745-5p   | -3.6714063 | down | 6.50E-13    |
| hsa-miR-135a-3p   | -3.6567793 | down | 2.59E-05    |
| hsa-miR-3141      | -3.607383  | down | 0.007044534 |
| hsa-miR-584-5p    | -3.6054554 | down | 2.43E-08    |
| hsa-miR-320a      | -3.6046314 | down | 0.026258538 |
| hsa-miR-335-5p    | -3.5905132 | down | 1.61E-14    |
| hsa-miR-1914-3p   | -3.5813653 | down | 2.12E-22    |
| hsa-miR-6126      | -3.5677655 | down | 7.63E-11    |
| hsa-miR-3656      | -3.5512922 | down | 0.03379125  |
| hsa-miR-762       | -3.5477028 | down | 0.007860391 |
| hsa-miR-7847-3p   | -3.5377665 | down | 0.035498    |
| hsa-miR-6831-5p   | -3.5358574 | down | 0.01728924  |
| hsa-miR-27a-3p    | -3.510689  | down | 0.022960031 |
| hsa-miR-486-3p    | -3.454302  | down | 2.87E-11    |
| hsa-miR-17-3p     | -3.43685   | down | 2.66E-04    |
| hsa-miR-146b-5p   | -3.3099542 | down | 5.29E-10    |
| hsa-miR-1249-5p   | -3.2941897 | down | 4.93E-09    |
| hsa-miR-2861      | -3.293926  | down | 0.022118533 |
| hsa-miR-6756-5p   | -3.28809   | down | 1.50E-04    |
| hsa-miR-29b-3p    | -3.2052658 | down | 0.00967639  |
| hsa-let-7e-5p     | -3.197785  | down | 2.01E-05    |
| hsa-miR-3610      | -3.1922328 | down | 4.32E-12    |
| hsa-miR-378i      | -3.1648498 | down | 3.88E-05    |
| hsa-miR-16-2-3p   | -3.1548777 | down | 0.00455271  |
| hsa-miR-7845-5p   | -3.1460974 | down | 4.05E-10    |
| hsa-miR-6086      | -3.1291914 | down | 1.11E-06    |
| hsa-miR-377-3p    | -3.126262  | down | 4.52E-14    |
| hsa-miR-194-5p    | -3.1255758 | down | 1.32E-09    |
| hsa-miR-500a-3p   | -3.111047  | down | 3.56E-11    |
| hsa-miR-320b      | -3.1086102 | down | 0.039215714 |
| hsa-miR-1185-1-3p | -3.0617254 | down | 8.89E-09    |
| hsa-miR-6833-5p   | -3.0580056 | down | 1.71E-04    |
| hsa-miR-4778-5p   | -3.056587  | down | 0.003259339 |

---

---

|                   |            |      |             |
|-------------------|------------|------|-------------|
| hsa-miR-221-3p    | -3.0081816 | down | 0.025633406 |
| hsa-miR-7106-5p   | -3.0031521 | down | 0.004926544 |
| hsa-miR-4476      | -3.001603  | down | 6.84E-11    |
| hsa-miR-1226-5p   | -2.9840605 | down | 7.26E-15    |
| hsa-let-7g-5p     | -2.9649425 | down | 0.002565142 |
| hsa-let-7f-5p     | -2.9450636 | down | 0.036886238 |
| hsa-let-7c-5p     | -2.8964581 | down | 0.02764962  |
| hsa-miR-106b-5p   | -2.880392  | down | 0.009247184 |
| hsa-miR-6723-5p   | -2.8754272 | down | 2.79E-09    |
| hsa-miR-4707-3p   | -2.8653567 | down | 4.33E-12    |
| hsa-miR-362-3p    | -2.8307793 | down | 1.02E-31    |
| hsa-miR-20b-5p    | -2.8220801 | down | 0.001286004 |
| hsa-miR-8087      | -2.7844002 | down | 1.39E-12    |
| hsa-miR-10a-5p    | -2.7692397 | down | 2.13E-11    |
| hsa-miR-198       | -2.7467237 | down | 0.001696119 |
| hsa-miR-338-3p    | -2.7454107 | down | 8.60E-05    |
| hsa-miR-125b-5p   | -2.7241395 | down | 4.89E-06    |
| hsa-miR-30a-5p    | -2.7066905 | down | 0.008074927 |
| hsa-miR-6819-5p   | -2.6976192 | down | 2.18E-06    |
| hsa-miR-6076      | -2.697427  | down | 6.83E-06    |
| hsa-miR-6889-5p   | -2.6741095 | down | 1.08E-13    |
| hsa-miR-4472      | -2.6384926 | down | 1.33E-06    |
| hsa-miR-498       | -2.6317935 | down | 3.11E-08    |
| hsa-miR-4689      | -2.6007855 | down | 3.07E-10    |
| hsa-miR-3945      | -2.558     | down | 1.44E-09    |
| hsa-miR-652-5p    | -2.5550196 | down | 1.01E-14    |
| hsa-miR-328-3p    | -2.4896476 | down | 0.003918324 |
| hsa-miR-4800-5p   | -2.4697614 | down | 0.032500193 |
| hsa-miR-32-5p     | -2.4687228 | down | 1.24E-23    |
| hsa-miR-34a-5p    | -2.4650748 | down | 5.55E-06    |
| hsa-miR-365a-3p   | -2.4522202 | down | 1.33E-09    |
| hsa-miR-6730-5p   | -2.427055  | down | 7.16E-16    |
| hsa-miR-936       | -2.422345  | down | 1.15E-12    |
| hsa-miR-557       | -2.4170825 | down | 1.49E-05    |
| hsa-miR-5196-5p   | -2.414294  | down | 2.66E-09    |
| hsa-miR-378a-3p   | -2.4078681 | down | 9.16E-05    |
| hsa-miR-361-3p    | -2.404694  | down | 6.46E-13    |
| hsa-miR-550a-3p   | -2.401832  | down | 4.54E-08    |
| hsa-miR-6738-5p   | -2.391808  | down | 2.43E-10    |
| hsa-miR-625-5p    | -2.3885949 | down | 3.16E-08    |
| hsa-miR-6806-5p   | -2.357881  | down | 3.26E-11    |
| hsa-miR-623       | -2.3486319 | down | 1.44E-05    |
| hsa-miR-1273f     | -2.3472059 | down | 1.15E-07    |
| hsa-miR-3911      | -2.333487  | down | 3.70E-04    |
| hsa-miR-6075      | -2.3249643 | down | 1.57E-10    |
| hsa-miR-550a-3-5p | -2.3247764 | down | 8.07E-14    |
| hsa-miR-500b-5p   | -2.3205512 | down | 1.26E-19    |
| hsa-miR-3158-5p   | -2.317846  | down | 1.14E-16    |
| hsa-miR-6820-5p   | -2.3088505 | down | 1.80E-05    |
| hsa-miR-502-3p    | -2.2820218 | down | 2.08E-08    |
| hsa-miR-497-5p    | -2.2775123 | down | 7.66E-10    |
| hsa-miR-4429      | -2.2772121 | down | 7.68E-05    |
| hsa-miR-6790-5p   | -2.275993  | down | 3.22E-07    |
| hsa-miR-28-5p     | -2.2643461 | down | 8.66E-12    |
| hsa-miR-4318      | -2.2464552 | down | 4.09E-10    |
| hsa-miR-505-3p    | -2.236741  | down | 5.58E-12    |
| hsa-miR-1224-5p   | -2.2265306 | down | 4.08E-08    |
| hsa-miR-3156-5p   | -2.2008436 | down | 6.54E-14    |
| hsa-miR-6073      | -2.1952627 | down | 1.40E-04    |
| hsa-miR-19b-3p    | -2.182291  | down | 0.001249115 |
| hsa-miR-222-3p    | -2.1678562 | down | 0.033816654 |
| hsa-miR-6778-5p   | -2.1623857 | down | 3.60E-07    |
| hsa-miR-15b-3p    | -2.1525402 | down | 5.76E-23    |
| hsa-miR-4314      | -2.1511378 | down | 1.93E-07    |
| hsa-miR-4701-3p   | -2.1483965 | down | 0.001433074 |

---



|                   |            |      |             |
|-------------------|------------|------|-------------|
| hsa-miR-29c-5p    | -2.143977  | down | 3.15E-10    |
| hsa-miR-196b-5p   | -2.1385567 | down | 1.47E-20    |
| hsa-miR-100-5p    | -2.1351373 | down | 1.85E-09    |
| hsa-miR-15a-5p    | -2.1227117 | down | 4.08E-05    |
| hsa-miR-495-3p    | -2.1154683 | down | 6.24E-09    |
| hsa-miR-22-5p     | -2.0690458 | down | 3.23E-13    |
| hsa-miR-624-5p    | -2.0602736 | down | 7.98E-22    |
| hsa-miR-4695-5p   | -2.031634  | down | 9.59E-05    |
| hsa-miR-6840-3p   | -2.0093098 | down | 7.40E-10    |
| hsa-let-7i-5p     | -2.0085988 | down | 5.63E-04    |
| hsa-miR-25-3p     | -2.0036635 | down | 0.002725539 |
| hsa-miR-4481      | -1.997419  | down | 5.80E-14    |
| hsa-miR-20a-5p    | -1.992616  | down | 0.001618002 |
| hsa-miR-6757-5p   | -1.9623383 | down | 1.86E-10    |
| hsa-miR-4673      | -1.9251508 | down | 1.26E-09    |
| hsa-miR-4734      | -1.9112371 | down | 1.40E-08    |
| hsa-miR-6802-5p   | -1.8871756 | down | 4.04E-09    |
| hsa-miR-99a-5p    | -1.8753809 | down | 6.92E-08    |
| hsa-miR-601       | -1.8691542 | down | 1.76E-07    |
| hsa-miR-1185-2-3p | -1.8633478 | down | 5.18E-08    |
| hsa-miR-145-5p    | -1.8623804 | down | 3.66E-04    |
| hsa-miR-136-5p    | -1.856118  | down | 9.59E-04    |
| hsa-miR-139-3p    | -1.8543397 | down | 8.61E-13    |
| hsa-miR-5685      | -1.8530449 | down | 9.10E-06    |
| hsa-miR-629-5p    | -1.8488889 | down | 8.91E-07    |
| hsa-miR-6768-5p   | -1.8224642 | down | 7.51E-11    |
| hsa-miR-3960      | -1.8120283 | down | 0.009938992 |
| hsa-miR-7846-3p   | -1.7743001 | down | 2.63E-04    |
| hsa-miR-6809-5p   | -1.7526833 | down | 0.029643845 |
| hsa-miR-378d      | -1.7186202 | down | 3.17E-09    |
| hsa-miR-4496      | -1.7063788 | down | 5.32E-07    |
| hsa-miR-187-5p    | -1.6826344 | down | 4.76E-07    |
| hsa-miR-30e-3p    | -1.6719811 | down | 4.26E-05    |
| hsa-miR-8089      | -1.6492912 | down | 1.69E-05    |
| hsa-miR-3202      | -1.6320455 | down | 0.001248828 |
| hsa-miR-1343-5p   | -1.6278356 | down | 5.91E-05    |
| hsa-miR-4746-3p   | -1.627519  | down | 1.04E-05    |
| hsa-miR-4787-3p   | -1.6266427 | down | 6.14E-04    |
| hsa-miR-4767      | -1.6191354 | down | 5.44E-09    |
| hsa-miR-3137      | -1.6032785 | down | 0.011920111 |
| hsa-miR-4322      | -1.6000853 | down | 5.57E-06    |
| hsa-miR-6129      | -1.5939972 | down | 3.26E-05    |
| hsa-miR-8073      | -1.5894003 | down | 1.87E-04    |
| hsa-miR-196a-5p   | -1.5715226 | down | 5.73E-07    |
| hsa-miR-6784-5p   | -1.5477245 | down | 2.89E-04    |
| hsa-miR-654-3p    | -1.5470378 | down | 9.51E-05    |
| hsa-miR-487b-3p   | -1.543488  | down | 0.002326863 |
| hsa-miR-4253      | -1.5357696 | down | 1.65E-04    |
| hsa-miR-3923      | -1.5347615 | down | 2.28E-06    |
| hsa-miR-3198      | -1.5345788 | down | 5.26E-04    |
| hsa-miR-4317      | -1.5343933 | down | 9.93E-09    |
| hsa-miR-133b      | -1.5296113 | down | 7.33E-05    |
| hsa-miR-6071      | -1.5261133 | down | 6.58E-05    |
| hsa-miR-513a-5p   | -1.5219287 | down | 0.011546293 |
| hsa-miR-224-5p    | -1.5217549 | down | 5.49E-06    |
| hsa-miR-6741-5p   | -1.5131516 | down | 0.026460359 |
| hsa-miR-1228-3p   | 32.27718   | up   | 3.42E-12    |
| hsa-miR-4730      | 30.422903  | up   | 2.83E-17    |
| hsa-miR-6716-3p   | 29.729202  | up   | 1.68E-16    |
| hsa-miR-6800-3p   | 29.503895  | up   | 9.18E-11    |
| hsa-miR-6508-5p   | 28.357412  | up   | 8.31E-11    |
| hsa-miR-6069      | 28.025434  | up   | 1.00E-11    |
| hsa-miR-1238-3p   | 27.997011  | up   | 1.77E-11    |
| hsa-miR-451b      | 27.348436  | up   | 6.54E-11    |
| hsa-miR-6737-3p   | 24.871214  | up   | 6.56E-12    |



|                  |            |    |             |
|------------------|------------|----|-------------|
| hsa-miR-5010-3p  | 23.709328  | up | 1.11E-10    |
| hsa-miR-191-3p   | 21.585037  | up | 3.30E-10    |
| hsa-miR-4433a-5p | 20.750298  | up | 6.51E-12    |
| hsa-miR-1234-3p  | 20.488674  | up | 1.48E-09    |
| hsa-miR-3162-3p  | 19.78715   | up | 3.22E-13    |
| hsa-miR-1281     | 19.084553  | up | 2.54E-10    |
| hsa-miR-4455     | 18.082542  | up | 4.14E-09    |
| hsa-miR-6797-3p  | 18.079847  | up | 6.06E-11    |
| hsa-miR-574-5p   | 15.281876  | up | 3.38E-09    |
| hsa-miR-1825     | 14.909924  | up | 2.33E-08    |
| hsa-miR-4665-3p  | 14.3801985 | up | 6.29E-09    |
| hsa-miR-940      | 14.21207   | up | 5.06E-10    |
| hsa-miR-6751-3p  | 11.924637  | up | 6.65E-06    |
| hsa-miR-6851-3p  | 10.274067  | up | 4.08E-06    |
| hsa-miR-8485     | 10.240803  | up | 1.65E-06    |
| hsa-miR-1304-3p  | 9.692887   | up | 4.43E-05    |
| hsa-miR-4313     | 9.627616   | up | 4.77E-05    |
| hsa-miR-4649-3p  | 8.847954   | up | 2.86E-06    |
| hsa-miR-4725-5p  | 7.8299713  | up | 1.93E-04    |
| hsa-miR-6813-3p  | 7.5761566  | up | 3.55E-05    |
| hsa-miR-32-3p    | 7.5108023  | up | 3.72E-05    |
| hsa-miR-6870-3p  | 7.2413974  | up | 9.60E-05    |
| hsa-miR-4769-3p  | 6.9003167  | up | 5.20E-05    |
| hsa-miR-6834-3p  | 5.953099   | up | 3.99E-04    |
| hsa-miR-3149     | 5.6869464  | up | 4.85E-04    |
| hsa-miR-7114-3p  | 5.6578975  | up | 2.53E-04    |
| hsa-miR-4446-5p  | 5.199757   | up | 0.001480785 |
| hsa-miR-4284     | 4.7353096  | up | 0.012844542 |
| hsa-miR-1250-3p  | 4.440918   | up | 0.001619956 |
| hsa-miR-483-3p   | 4.3843226  | up | 0.003350844 |
| hsa-miR-6514-3p  | 4.2128963  | up | 0.008658452 |
| hsa-miR-6515-3p  | 4.108173   | up | 0.003259649 |
| hsa-miR-1290     | 3.9771118  | up | 2.92E-04    |
| hsa-miR-4485-5p  | 3.619606   | up | 0.035324756 |
| hsa-miR-6861-3p  | 3.578525   | up | 0.003532203 |
| hsa-miR-6889-3p  | 3.514845   | up | 0.008078669 |
| hsa-miR-1246     | 3.4087684  | up | 1.19E-06    |
| hsa-miR-6760-3p  | 3.3645709  | up | 0.005375398 |
| hsa-miR-3653-5p  | 3.3227017  | up | 0.001715339 |
| hsa-miR-491-3p   | 3.0987763  | up | 0.002226062 |
| hsa-miR-933      | 2.9197109  | up | 0.004580116 |
| hsa-miR-1273g-3p | 2.7311556  | up | 0.006227011 |
| hsa-miR-6798-3p  | 2.6818657  | up | 0.012433725 |
| hsa-miR-4290     | 2.638919   | up | 0.037525527 |
| hsa-miR-6880-3p  | 2.1112335  | up | 0.024522016 |
| hsa-miR-4749-3p  | 2.060287   | up | 0.020719018 |
| hsa-miR-6778-3p  | 1.9191736  | up | 0.013868927 |
| hsa-miR-3613-3p  | 1.8628482  | up | 0.040795192 |
| hsa-miR-34b-3p   | 1.8161502  | up | 0.025234645 |
| hsa-miR-1224-3p  | 1.7235461  | up | 0.035547186 |
| hsa-miR-6805-5p  | 1.5911901  | up | 0.030013535 |

**Table S7.** Differentially expressed miRNAs were analyzed in plasma chemotreated colorectal cancer patients versus untreated colorectal cancer patients. The threshold value for upregulated and downregulated genes was a fold change  $\geq 1.5$  and  $p$ -value  $\leq 0.05$ .

| Systematic_Name | FC (abs)   | Regulation | $p$         |
|-----------------|------------|------------|-------------|
| hsa-miR-574-3p  | -4.707971  | down       | 0.007044553 |
| hsa-miR-6088    | -4.2144275 | down       | 0.003552679 |
| hsa-miR-4455    | -3.8249462 | down       | 0.011860294 |
| hsa-miR-6125    | -3.7428992 | down       | 0.004982985 |
| hsa-miR-6740-5p | -3.725341  | down       | 0.039324444 |
| hsa-miR-5010-3p | -3.2811484 | down       | 0.021567397 |
| hsa-miR-32-3p   | -2.9936733 | down       | 0.03313809  |

|                 |            |      |             |
|-----------------|------------|------|-------------|
| hsa-miR-6165    | -2.942446  | down | 0.039437376 |
| hsa-miR-1290    | -2.670601  | down | 0.04024074  |
| hsa-miR-4730    | -2.2495148 | down | 0.04175604  |
| hsa-miR-6090    | -2.2029164 | down | 0.04453954  |
| hsa-miR-6089    | -2.135594  | down | 0.005230125 |
| hsa-miR-4281    | -1.7625313 | down | 0.025285373 |
| hsa-miR-3960    | -1.7338134 | down | 0.029885752 |
| hsa-miR-18a-5p  | 4.6639194  | up   | 0.001662072 |
| hsa-miR-151a-3p | 4.4174294  | up   | 0.001037019 |
| hsa-let-7d-5p   | 4.233113   | up   | 0.010206928 |
| hsa-miR-103a-3p | 4.15344    | up   | 0.013946099 |
| hsa-miR-26b-5p  | 3.9169278  | up   | 0.021480478 |
| hsa-miR-30e-5p  | 3.7584565  | up   | 0.008996997 |
| hsa-miR-26a-5p  | 3.6667118  | up   | 0.029952237 |
| hsa-miR-199a-5p | 3.595766   | up   | 0.020379977 |
| hsa-let-7f-5p   | 3.4678154  | up   | 0.025064226 |
| hsa-miR-23b-3p  | 3.2887168  | up   | 0.012643079 |
| hsa-miR-144-3p  | 3.201038   | up   | 0.038210653 |
| hsa-miR-17-5p   | 3.1981778  | up   | 0.009441602 |
| hsa-miR-29b-3p  | 3.0401678  | up   | 0.018676355 |
| hsa-miR-30b-5p  | 3.0304313  | up   | 0.030820938 |
| hsa-miR-19a-3p  | 2.9517112  | up   | 0.024809351 |
| hsa-miR-18b-5p  | 2.9143608  | up   | 0.004686276 |
| hsa-miR-30c-5p  | 2.9088764  | up   | 0.006498599 |
| hsa-miR-374a-5p | 2.8217683  | up   | 0.035894904 |
| hsa-miR-148b-3p | 2.607857   | up   | 0.020650163 |
| hsa-miR-328-3p  | 2.5699759  | up   | 0.020868253 |
| hsa-miR-181a-5p | 2.543037   | up   | 0.04186078  |
| hsa-miR-151b    | 2.5332196  | up   | 0.028695533 |
| hsa-miR-93-5p   | 2.397497   | up   | 0.027022392 |
| hsa-miR-374b-5p | 2.371192   | up   | 0.01429387  |
| hsa-miR-34a-5p  | 2.2413929  | up   | 0.004126904 |
| hsa-miR-106b-5p | 2.2385614  | up   | 0.041558307 |
| hsa-miR-324-3p  | 2.2074447  | up   | 0.041203555 |
| hsa-miR-210-3p  | 2.2065916  | up   | 0.046626933 |
| hsa-miR-20b-5p  | 2.1872258  | up   | 0.017583672 |
| hsa-miR-361-5p  | 2.138619   | up   | 0.031487927 |
| hsa-miR-584-5p  | 2.1347876  | up   | 0.008861961 |
| hsa-miR-96-5p   | 2.101457   | up   | 0.011548122 |
| hsa-miR-331-3p  | 1.9966366  | up   | 0.037425395 |
| hsa-miR-126-3p  | 1.9670222  | up   | 0.018098893 |
| hsa-miR-195-5p  | 1.8922216  | up   | 0.042993996 |
| hsa-miR-20a-5p  | 1.8627847  | up   | 0.004240367 |
| hsa-miR-215-5p  | 1.8601036  | up   | 0.04361076  |
| hsa-miR-532-5p  | 1.8593402  | up   | 0.01576892  |
| hsa-miR-19b-3p  | 1.8193731  | up   | 0.013355121 |
| hsa-miR-183-5p  | 1.7478797  | up   | 0.021310113 |
| hsa-miR-652-3p  | 1.7190313  | up   | 0.044040028 |
| hsa-miR-25-3p   | 1.6944741  | up   | 0.02510068  |
| hsa-miR-10b-5p  | 1.671827   | up   | 0.046438057 |
| hsa-miR-194-5p  | 1.6507075  | up   | 0.034387264 |
| hsa-miR-486-3p  | 1.6445782  | up   | 0.01744914  |
| hsa-miR-128-3p  | 1.642851   | up   | 0.033004418 |
| hsa-miR-16-5p   | 1.6003872  | up   | 0.030637063 |
| hsa-miR-21-5p   | 1.596436   | up   | 0.013982079 |
| hsa-miR-629-5p  | 1.5757582  | up   | 0.005779247 |

**Table S8.** Differentially expressed miRNAs were analyzed in plasma chemotreated rectal cancer patients versus untreated rectal cancer patients. The threshold value for upregulated and downregulated genes was a fold change  $\geq 1.5$  and  $p$ -value  $\leq 0.05$ .

| Systematic_Name | FC (abs)   | Regulation | p           |
|-----------------|------------|------------|-------------|
| hsa-miR-4455    | -10.197052 | down       | 0.002471766 |
| hsa-miR-6740-5p | -8.901676  | down       | 0.010032822 |

|                 |            |      |             |
|-----------------|------------|------|-------------|
| hsa-miR-574-3p  | -8.493112  | down | 0.010908118 |
| hsa-miR-3149    | -7.9205465 | down | 0.003406616 |
| hsa-miR-32-3p   | -6.936792  | down | 0.003502164 |
| hsa-miR-5010-3p | -6.359786  | down | 0.014490048 |
| hsa-miR-6834-3p | -5.377581  | down | 0.030148871 |
| hsa-miR-6739-5p | -4.8212924 | down | 0.007088768 |
| hsa-miR-451b    | -3.7644587 | down | 0.036476903 |
| hsa-miR-4644    | -3.4251516 | down | 0.01447643  |
| hsa-miR-26a-5p  | 8.998737   | up   | 0.007867808 |
| hsa-let-7d-5p   | 8.37634    | up   | 0.003975279 |
| hsa-miR-103a-3p | 7.846926   | up   | 0.010587392 |
| hsa-miR-26b-5p  | 7.004991   | up   | 0.010193903 |
| hsa-miR-30e-5p  | 5.6959457  | up   | 0.007506873 |
| hsa-miR-144-3p  | 5.5556955  | up   | 0.005611194 |
| hsa-miR-425-5p  | 5.441935   | up   | 0.03630426  |
| hsa-let-7f-5p   | 5.226171   | up   | 0.025616886 |
| hsa-miR-18a-5p  | 5.0511136  | up   | 0.027735166 |
| hsa-miR-19a-3p  | 4.863106   | up   | 0.016271124 |
| hsa-miR-151a-3p | 3.9572845  | up   | 0.025120396 |
| hsa-miR-30c-5p  | 3.79025    | up   | 0.0304551   |
| hsa-miR-29b-3p  | 3.787197   | up   | 0.00868337  |
| hsa-miR-23a-3p  | 3.3684056  | up   | 0.019133346 |
| hsa-miR-106b-5p | 3.2983665  | up   | 0.020186564 |
| hsa-miR-34a-5p  | 3.097207   | up   | 0.011985444 |
| hsa-miR-130a-3p | 2.9837472  | up   | 0.030885218 |
| hsa-miR-17-5p   | 2.7596178  | up   | 0.004184775 |
| hsa-let-7a-5p   | 2.6237125  | up   | 0.033776604 |
| hsa-miR-15b-5p  | 2.5663142  | up   | 0.001061199 |
| hsa-miR-126-3p  | 2.4664588  | up   | 0.008646518 |
| hsa-miR-215-5p  | 2.4504719  | up   | 0.049638417 |
| hsa-miR-19b-3p  | 2.4384582  | up   | 0.004268087 |
| hsa-miR-142-3p  | 2.3890023  | up   | 0.040102866 |
| hsa-let-7g-5p   | 2.2943914  | up   | 0.023863621 |
| hsa-miR-93-5p   | 2.229338   | up   | 0.014466448 |
| hsa-miR-20b-5p  | 2.2016134  | up   | 0.005933316 |
| hsa-miR-185-5p  | 2.0949988  | up   | 0.049758106 |
| hsa-miR-101-3p  | 2.0491412  | up   | 0.0189567   |
| hsa-miR-29c-3p  | 2.016969   | up   | 8.56E-04    |
| hsa-miR-21-5p   | 1.9557222  | up   | 0.008012681 |
| hsa-miR-107     | 1.9434578  | up   | 0.037316296 |
| hsa-miR-629-5p  | 1.8806     | up   | 0.015035483 |
| hsa-miR-20a-5p  | 1.8104604  | up   | 0.011932527 |
| hsa-miR-4306    | 1.796793   | up   | 0.024286147 |
| hsa-miR-22-3p   | 1.742627   | up   | 0.007275642 |
| hsa-miR-16-5p   | 1.6699768  | up   | 0.012902103 |
| hsa-miR-25-3p   | 1.6550758  | up   | 0.042343654 |
| hsa-miR-15a-5p  | 1.6123587  | up   | 0.004987674 |
| hsa-let-7i-5p   | 1.5934038  | up   | 0.020621313 |

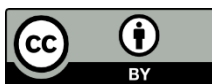

© 2020 by the authors. Licensee MDPI, Basel, Switzerland. This article is an open access article distributed under the terms and conditions of the Creative Commons Attribution (CC BY) license (<http://creativecommons.org/licenses/by/4.0/>).
